# Supplementary material for: The single-cell transcriptional landscape of the axolotl
Source: Research Square preprint supplement (doi:10.21203/rs.3.rs-960203/v1), 2021-10-13
Supplement: Supplementary file 2 [file 5ad4dc0e5346d3c596fdce8b.xlsx]

## Sheet: RNA_reads_per_cell
CH-RNA HEK293T	Paired-seq HEK293T	sci-CAR HEK293T	SPLiT-seq HEK293T	sci-RNA-seq HEK293T	Drop-seq HEK293T	10X scRNA-seq HEK293T	CH-RNA NIH/3T3	Paired-seq NIH/3T3	sci-CAR NIH/3T3	SPLiT-seq NIH/3T3	sci-RNA-seq NIH/3T3	Drop-seq NIH/3T3	10x scRNA-seq NIH/3T3
41118	10175	22145	54094	14619	26991	48131	24182	6962	15712	16212	9673	15785	19866
38356	10175	15178	48892	14619	26991	36386	23256	6604	15452	11434	9673	15785	19866
33529	6435	15178	45286	14619	17115	34379	20920	5777	14843	11059	9673	15785	19505
32863	6435	13694	43207	14619	17115	34379	19095	5769	14175	10671	9673	9782	19078
31255	5139	12846	40152	14619	16804	33895	17965	5641	13767	10306	9673	9782	19036
28681	5139	12773	34148	13235	16804	33895	16655	5600	13281	10199	9673	9667	17730
27710	5133	12308	30996	13235	16605	33732	15679	5537	12771	9843	9673	9667	17038
27590	4019	11629	27009	13235	16605	30971	15328	5487	11443	9636	8900	9029	16793
27395	4019	11411	26172	13235	16368	30971	14672	5376	11394	9216	8900	9029	16793
27048	3846	11049	25181	12789	16368	29952	14211	5323	11167	8923	8900	8496	16462
26850	3801	10724	24524	12789	15715	28637	14170	5313	11049	8831	8900	8496	16462
26018	3801	10724	24280	12789	15715	28616	14052	5266	10665	8778	8900	7996	14298
25988	3785	10596	23215	12789	14745	28616	14025	5110	10630	8483	8900	7996	14183
25542	3785	10521	22872	12789	14745	27264	13806	5093	10539	8465	8900	7785	13948
25524	3508	10366	21861	12522	13903	27264	13562	5092	10479	8385	8900	7785	13552
25253	3508	10366	21679	12522	13903	27138	13545	5077	10403	8274	7207	7764	12958
24772	3334	10314	21220	12522	13820	27138	13541	4985	9936	8250	7207	7764	12771
24607	3334	10314	20410	12522	13820	27120	12843	4920	9672	8166	7207	7554	12771
24107	3277	10234	20078	12522	13677	27120	12608	4895	9587	8154	7207	7554	12734
23883	3248	10000	20024	12210	13677	26803	12500	4788	9559	8105	7207	7510	12460
23794	3248	10000	19980	12210	13470	26803	12449	4761	9362	8044	7207	7510	12460
23428	3217	9979	19980	12210	13470	26770	12378	4674	9299	7977	7207	7345	12383
22643	3217	9921	19506	12210	13390	26770	12360	4665	9297	7899	7146	7345	12138
21918	3159	9691	19395	12210	13390	26494	12268	4643	9237	7899	7146	7281	12098
21662	3159	9512	19218	11853	13218	26494	12209	4558	9173	7862	7146	7281	11767
21482	3020	9405	18901	11853	13218	26319	12139	4486	9022	7847	7146	7252	11721
21453	3020	9405	18783	11853	12393	26310	12076	4458	8821	7673	7146	7252	11647
20688	2957	9330	17771	11853	12393	26310	12036	4430	8753	7630	7146	7252	11503
20660	2902	9264	17695	11853	12102	26152	11862	4408	8730	7546	7146	7176	11367
20265	2817	9211	17695	11262	12102	25941	11827	4336	8687	7414	6937	7176	11367
20261	2817	9211	17470	11262	12047	25941	11801	4327	8662	7360	6937	7126	11161
20227	2805	9155	17470	11262	12047	25913	11698	4326	8658	7321	6937	7126	11155
20021	2805	9028	17294	11262	11565	25913	11696	4250	8569	7268	6937	7059	11148
19851	2791	8991	17226	11262	11565	24750	11668	4224	8502	7260	6937	7059	11141
19651	2770	8980	16950	10860	11422	24750	11628	4175	8347	7254	6937	6577	11136
19499	2770	8875	16938	10860	11422	24690	11624	4097	8336	6974	6937	6577	11136
19360	2770	8875	16900	10860	11259	24690	11592	4084	8312	6901	6937	6541	11084
19178	2728	8794	16890	10860	11259	24524	11579	4052	8305	6881	6716	6541	11069
18765	2728	8598	16825	10681	11096	24524	11518	4039	8273	6831	6716	6497	11066
18725	2695	8598	16263	10681	11096	24487	11475	3993	8268	6678	6716	6497	11056
18663	2645	8591	16217	10681	10942	24252	11473	3984	8265	6545	6716	6463	10954
18532	2645	8558	16214	10681	10942	24194	11412	3936	8221	6524	6716	6463	10954
18237	2643	8231	16191	10681	10702	24194	11411	3932	8182	6484	6716	6421	10808
18224	2643	8039	16006	10604	10702	24025	11347	3919	8137	6397	6716	6421	10733
17978	2586	8039	16002	10604	10406	24025	11342	3897	8086	6312	6581	6388	10561
17744	2586	7914	15799	10604	10406	23772	11329	3875	8049	6305	6581	6388	10442
17594	2493	7766	15768	10604	10147	23772	11181	3869	7924	6304	6581	6288	10277
17524	2493	7689	15610	10604	10147	23635	11151	3790	7799	6292	6581	6288	10277
17220	2492	7647	15553	10556	10036	23586	11134	3783	7697	6169	6581	6279	10252
17137	2492	7604	15482	10556	10036	23586	11122	3775	7613	6162	6581	6279	10232
17092	2462	7587	15402	10556	9969	23550	11101	3774	7429	6114	6581	6279	10232
16952	2462	7432	15387	10556	9969	23550	11059	3756	7422	6112	6581	6067	10215
16921	2422	7383	15228	10556	9921	23533	11045	3742	7405	6112	6412	6067	10186
16740	2422	7383	15163	10283	9921	23533	10959	3711	7384	6087	6412	5822	10142
16465	2404	7381	15092	10283	9832	23336	10957	3701	7382	6084	6412	5822	10142
16447	2394	7307	15031	10283	9832	23336	10953	3699	7357	6062	6412	5784	10135
16221	2394	7304	15030	10283	9826	23321	10808	3694	7352	6050	6412	5784	10113
16178	2376	7270	14992	10168	9826	23321	10798	3691	7349	6006	6412	5682	10027
16150	2376	7151	14870	10168	9812	23257	10692	3683	7332	6004	6412	5682	10018
16089	2376	7130	14849	10168	9812	23257	10629	3681	7098	6004	6412	5603	10014
15768	2376	7078	14513	10168	9757	23080	10612	3649	6935	5978	6383	5603	9997
15724	2350	7041	14436	10168	9757	23080	10553	3647	6925	5851	6383	5496	9923
15677	2345	7008	14436	9007	9672	22860	10540	3637	6919	5851	6383	5496	9923
15628	2345	6926	14421	9007	9672	22860	10489	3622	6878	5844	6383	5397	9808
15572	2316	6902	14402	9007	9637	22669	10481	3616	6867	5830	6383	5397	9794
15525	2316	6880	14347	9007	9637	22477	10433	3606	6863	5808	6383	5373	9794
15396	2302	6788	14279	9007	9278	22413	10409	3606	6823	5779	6383	5373	9698
15295	2302	6788	14026	8716	9278	22413	10379	3595	6809	5771	6383	5371	9651
15277	2295	6647	13898	8716	9265	22312	10375	3592	6760	5752	6299	5371	9609
15243	2295	6583	13898	8716	9265	22312	10375	3587	6747	5740	6299	5339	9609
15014	2292	6583	13721	8716	9240	22027	10354	3579	6746	5740	6299	5339	9538
14830	2292	6571	13705	8716	9240	22027	10349	3578	6715	5739	6299	5331	9504
14816	2289	6571	13704	8615	9181	22007	10248	3537	6712	5735	6299	5331	9504
14692	2289	6558	13660	8615	9181	21974	10217	3535	6710	5717	6299	5305	9454
14664	2260	6539	13660	8615	8965	21914	10202	3523	6684	5703	6299	5305	9454
14613	2260	6534	13619	8615	8965	21914	10183	3517	6666	5666	6125	5305	9349
14559	2244	6501	13619	8120	8722	21903	10117	3503	6506	5659	6125	5192	9347
14402	2244	6415	13618	8120	8722	21903	10047	3489	6437	5646	6125	5192	9325
14401	2227	6400	13513	8120	8643	21871	10022	3476	6436	5634	6125	5179	9194
14392	2227	6390	13509	8120	8643	21871	10012	3470	6342	5625	6125	5179	9151
14311	2224	6387	13417	8120	8544	21771	10001	3470	6321	5625	6125	4962	9087
14247	2224	6336	13198	8115	8544	21747	10000	3462	6285	5607	6125	4962	9021
14171	2220	6280	13163	8115	8343	21747	9990	3440	6261	5575	6125	4902	9021
14135	2220	6252	13163	8115	8343	21697	9986	3436	6246	5572	5811	4902	8923
14120	2191	6244	13122	8115	8230	21697	9955	3426	6221	5567	5811	4878	8921
14116	2172	6225	12733	8115	8230	21695	9941	3419	6187	5529	5811	4878	8850
14062	2172	6142	12519	8100	8168	21695	9914	3419	6159	5528	5811	4810	8841
14056	2161	6105	12446	8100	8168	21665	9904	3418	6150	5524	5811	4810	8841
14053	2161	6105	12428	8100	8161	21665	9896	3418	6064	5519	5811	4743	8836
14046	2118	6079	12154	8100	8161	21650	9837	3403	6015	5493	5811	4743	8822
14026	2118	6065	12141	8100	8092	21650	9832	3391	5990	5416	5551	4719	8786
13828	2109	6045	12141	8079	8092	21107	9819	3391	5915	5399	5551	4719	8777
13781	2109	6044	12134	8079	8017	21107	9795	3390	5856	5392	5551	4676	8770
13679	2096	6044	12019	8079	8017	21074	9733	3378	5826	5340	5551	4676	8760
13676	2091	5995	11960	8079	8014	21074	9708	3373	5812	5339	5551	4594	8739
13664	2091	5924	11944	8079	8014	21055	9685	3358	5798	5338	5551	4594	8643
13610	2091	5920	11917	8077	7993	21055	9678	3352	5797	5334	5551	4571	8626
13600	2088	5920	11913	8077	7993	20984	9671	3342	5771	5321	5433	4571	8625
13545	2088	5886	11905	8077	7965	20984	9669	3328	5647	5315	5433	4523	8608
13541	2086	5854	11905	8077	7965	20980	9659	3326	5587	5230	5433	4523	8564
13512	2083	5827	11810	8023	7710	20980	9608	3324	5484	5205	5433	4451	8564
13512	2051	5827	11755	8023	7710	20895	9517	3323	5452	5205	5433	4451	8551
13473	2051	5803	11689	8023	7600	20895	9448	3310	5450	5202	5433	4439	8547
13471	2046	5782	11673	8023	7600	20890	9446	3305	5436	5197	5433	4439	8540
13431	2043	5779	11673	8023	7592	20890	9401	3285	5409	5186	5433	4431	8535
13401	2043	5767	11588	7865	7592	20828	9375	3281	5406	5179	5430	4431	8535
13386	2037	5744	11579	7865	7572	20828	9369	3278	5386	5176	5430	4427	8521
13381	2029	5717	11579	7865	7572	20788	9292	3275	5276	5172	5430	4427	8498
13358	2029	5704	11563	7865	7402	20678	9274	3261	5255	5134	5430	4415	8429
13267	2018	5696	11429	7865	7402	20608	9269	3259	5232	5108	5430	4415	8401
13182	2018	5696	11429	7820	7304	20608	9262	3256	5181	5071	5430	4414	8375
13176	2007	5693	11429	7820	7304	20605	9148	3248	5087	5056	5430	4414	8367
13145	2007	5682	11397	7820	7263	20605	9140	3247	5076	5045	5430	4390	8363
13105	2002	5656	11390	7820	7263	20547	9136	3245	5062	5038	5430	4390	8363
13099	2002	5656	11390	7820	7189	20547	9091	3237	5062	5033	5430	4342	8349
13077	1991	5655	11380	7814	7189	20494	9085	3223	5040	4983	5430	4342	8347
13060	1991	5655	11296	7814	7169	20494	9042	3218	5032	4930	5430	4284	8347
13054	1985	5653	11291	7814	7169	20430	9030	3209	5025	4921	5430	4284	8345
12889	1985	5653	11220	7814	7107	20430	9005	3194	4988	4909	5430	4283	8335
12888	1968	5652	11220	7814	7107	20423	8993	3190	4985	4885	5430	4283	8326
12823	1968	5622	11218	7749	7045	20423	8961	3183	4984	4861	5388	4222	8326
12823	1964	5553	11177	7749	7045	20401	8907	3181	4966	4854	5388	4222	8322
12809	1964	5553	11129	7749	7009	20401	8886	3174	4962	4848	5388	4190	8317
12800	1962	5526	11128	7749	7009	20349	8846	3174	4893	4846	5388	4190	8317
12778	1951	5504	11092	7749	6937	20349	8829	3170	4890	4835	5388	4171	8277
12759	1951	5498	11051	7640	6937	20349	8823	3166	4859	4823	5388	4171	8277
12738	1949	5486	11051	7640	6799	20349	8793	3165	4831	4789	5388	4146	8249
12718	1949	5448	11031	7640	6799	20110	8783	3163	4803	4777	5352	4146	8227
12703	1949	5443	10994	7640	6771	20104	8716	3153	4801	4774	5352	4133	8227
12654	1948	5428	10981	7618	6771	20104	8665	3129	4793	4774	5352	4133	8222
12648	1924	5401	10981	7618	6703	19993	8665	3122	4771	4768	5352	4080	8198
12642	1920	5400	10937	7618	6703	19993	8640	3122	4770	4768	5352	4080	8171
12642	1919	5375	10906	7618	6689	19986	8608	3120	4746	4747	5352	4041	8170
12632	1910	5368	10896	7618	6689	19986	8602	3112	4700	4735	5352	4041	8144
12623	1906	5365	10888	7608	6679	19915	8585	3102	4699	4735	5352	4037	8144
12616	1900	5353	10851	7608	6679	19911	8570	3102	4684	4731	5337	4037	8123
12569	1898	5331	10851	7608	6673	19876	8568	3093	4658	4719	5337	4016	8123
12506	1877	5299	10832	7608	6673	19876	8564	3089	4627	4718	5337	4016	8116
12499	1877	5276	10832	7608	6614	19839	8544	3083	4575	4704	5337	4013	8052
12478	1875	5189	10795	7539	6614	19839	8507	3079	4570	4662	5337	4013	8052
12467	1875	5178	10774	7539	6612	19807	8500	3072	4557	4658	5337	3979	8036
12429	1867	5178	10747	7539	6612	19807	8486	3066	4547	4653	5337	3979	8036
12415	1867	5131	10724	7539	6599	19760	8477	3065	4504	4641	5337	3966	8012
12355	1861	5114	10701	7539	6599	19651	8476	3046	4473	4571	5309	3966	7974
12307	1861	5108	10700	7438	6595	19651	8475	3045	4472	4564	5309	3962	7963
12273	1860	5108	10675	7438	6595	19646	8432	3044	4462	4562	5309	3962	7963
12271	1860	5096	10671	7438	6567	19639	8401	3034	4460	4545	5309	3949	7918
12271	1860	5040	10671	7438	6567	19571	8374	3012	4454	4542	5309	3949	7910
12265	1858	5040	10595	7438	6561	19571	8351	3009	4448	4540	5309	3912	7909
12173	1856	5038	10570	7373	6561	19559	8349	3003	4443	4522	5309	3912	7905
12082	1856	4985	10570	7373	6527	19533	8299	2998	4429	4518	5258	3908	7902
12079	1856	4973	10544	7373	6527	19533	8270	2996	4421	4516	5258	3908	7902
12038	1856	4973	10515	7373	6526	19262	8259	2990	4388	4516	5258	3889	7897
11985	1850	4947	10509	7373	6526	19262	8258	2989	4375	4470	5258	3889	7896
11968	1850	4908	10459	7343	6502	19259	8234	2985	4355	4464	5258	3882	7877
11959	1847	4888	10459	7343	6502	19226	8201	2983	4350	4460	5258	3882	7877
11934	1847	4883	10432	7343	6500	19226	8150	2975	4349	4452	5258	3856	7849
11921	1844	4864	10415	7343	6500	19195	8144	2974	4318	4450	5217	3856	7849
11917	1844	4864	10300	7338	6483	19134	8129	2969	4307	4439	5217	3855	7829
11916	1844	4837	10268	7338	6483	19134	8103	2967	4306	4438	5217	3855	7821
11914	1844	4815	10264	7338	6383	19133	8094	2962	4285	4403	5217	3844	7818
11889	1843	4815	10264	7338	6383	19133	8085	2962	4264	4384	5217	3844	7814
11865	1843	4808	10238	7250	6323	19037	8084	2956	4197	4368	5217	3844	7814
11864	1837	4702	10218	7250	6323	18913	8059	2954	4175	4366	5217	3844	7806
11862	1837	4558	10127	7250	6320	18913	8058	2950	4170	4365	5217	3832	7801
11806	1827	4516	10121	7250	6320	18897	8047	2946	4169	4362	5119	3832	7798
11778	1827	4502	10107	7250	6244	18897	8036	2938	4135	4337	5119	3823	7796
11754	1815	4472	10090	7103	6244	18818	8013	2930	4131	4334	5119	3823	7792
11715	1815	4452	10086	7103	6242	18818	8011	2930	4088	4328	5119	3799	7792
11708	1814	4452	10086	7103	6242	18816	8006	2929	4087	4312	5119	3799	7784
11701	1814	4441	10024	7103	6225	18764	7964	2929	4084	4306	5119	3794	7782
11691	1805	4441	9995	7103	6225	18764	7960	2926	4078	4299	5119	3794	7782
11659	1805	4440	9939	7053	6199	18675	7917	2918	4057	4293	5064	3788	7768
11580	1803	4440	9918	7053	6199	18675	7910	2909	4026	4287	5064	3788	7764
11564	1801	4431	9879	7053	6175	18646	7906	2904	4023	4257	5064	3773	7749
11527	1795	4405	9841	7053	6175	18646	7906	2894	4013	4253	5064	3773	7722
11520	1788	4405	9840	7053	6168	18633	7867	2889	3995	4249	5064	3735	7721
11502	1784	4403	9816	7004	6168	18633	7866	2883	3994	4241	5064	3735	7705
11450	1784	4337	9808	7004	6132	18616	7841	2882	3994	4228	5064	3719	7645
11385	1782	4337	9728	7004	6132	18577	7829	2867	3977	4226	5028	3719	7643
11377	1780	4295	9718	7004	6102	18577	7817	2854	3972	4206	5028	3714	7643
11375	1777	4281	9638	7004	6102	18554	7800	2849	3968	4206	5028	3714	7643
11371	1777	4264	9628	6941	6061	18554	7781	2849	3963	4204	5028	3696	7610
11287	1767	4262	9580	6941	6061	18538	7732	2849	3962	4189	5028	3696	7572
11269	1767	4217	9528	6941	5979	18538	7711	2821	3947	4175	5028	3666	7563
11197	1755	4209	9525	6941	5979	18483	7708	2783	3937	4169	5028	3666	7563
11185	1754	4208	9481	6941	5918	18483	7687	2783	3927	4166	5028	3665	7531
11165	1748	4195	9479	6764	5918	18440	7681	2781	3925	4157	5025	3665	7522
11146	1748	4176	9467	6764	5861	18440	7679	2780	3923	4151	5025	3660	7481
11138	1743	4175	9392	6764	5861	18429	7670	2780	3918	4143	5025	3660	7470
11095	1743	4171	9384	6764	5836	18429	7639	2772	3906	4136	5025	3654	7469
11088	1738	4167	9286	6764	5836	18414	7586	2771	3881	4126	5025	3654	7467
11085	1719	4154	9277	6745	5823	18333	7583	2766	3878	4122	5025	3641	7458
11078	1719	4140	9182	6745	5823	18279	7581	2747	3871	4122	5025	3641	7457
11077	1719	4139	9176	6745	5799	18279	7558	2744	3846	4117	5019	3613	7457
11060	1718	4123	9103	6745	5799	18277	7552	2739	3845	4115	5019	3613	7456
11059	1717	4114	9060	6745	5770	18252	7536	2731	3844	4115	5019	3610	7438
11044	1717	4093	9060	6742	5770	18132	7535	2729	3833	4111	5019	3610	7431
11036	1703	4093	8944	6742	5706	18126	7533	2721	3810	4101	5019	3592	7424
11015	1703	4079	8927	6742	5706	18115	7524	2716	3792	4087	5019	3592	7414
10981	1702	4063	8915	6742	5701	18076	7510	2706	3781	4076	5019	3574	7410
10921	1694	4063	8915	6735	5701	18076	7509	2704	3773	4076	5019	3574	7398
10918	1687	4063	8902	6735	5676	18067	7503	2694	3772	4072	5012	3560	7387
10900	1687	4039	8876	6735	5676	17933	7500	2687	3771	4065	5012	3560	7380
10837	1685	4034	8816	6735	5671	17933	7491	2682	3770	4045	5012	3543	7375
10836	1684	4006	8816	6735	5671	17908	7477	2675	3767	4041	5012	3543	7375
10807	1684	3983	8812	6699	5526	17908	7474	2672	3758	4040	5012	3537	7367
10802	1684	3980	8805	6699	5526	17757	7469	2666	3744	4036	5012	3537	7321
10743	1679	3975	8792	6699	5492	17713	7466	2661	3726	4034	5012	3477	7308
10740	1679	3966	8757	6699	5492	17693	7464	2660	3712	4025	5012	3477	7303
10730	1673	3920	8757	6699	5491	17693	7458	2655	3684	4013	4968	3469	7303
10719	1669	3920	8732	6577	5491	17639	7456	2642	3678	4010	4968	3469	7300
10715	1665	3919	8732	6577	5476	17637	7454	2637	3677	4010	4968	3450	7289
10707	1660	3906	8710	6577	5476	17637	7445	2613	3673	4004	4968	3450	7287
10702	1660	3906	8692	6577	5470	17625	7445	2612	3662	3998	4968	3433	7286
10693	1660	3899	8687	6577	5470	17625	7415	2611	3651	3981	4968	3433	7283
10692	1658	3881	8647	6560	5438	17597	7411	2607	3630	3978	4968	3431	7273
10680	1658	3873	8647	6560	5438	17597	7404	2605	3625	3978	4925	3431	7271
10678	1645	3859	8645	6560	5426	17568	7387	2598	3606	3972	4925	3421	7269
10651	1645	3837	8632	6560	5426	17549	7366	2595	3590	3966	4925	3421	7269
10650	1640	3837	8601	6560	5406	17549	7366	2584	3585	3938	4925	3417	7269
10643	1637	3837	8594	6541	5406	17472	7338	2581	3577	3934	4925	3417	7258
10636	1637	3826	8583	6541	5396	17472	7335	2570	3567	3929	4925	3395	7252
10582	1635	3804	8580	6541	5396	17436	7330	2567	3564	3928	4925	3395	7244
10578	1635	3797	8555	6541	5387	17436	7326	2567	3557	3910	4893	3392	7244
10569	1631	3796	8507	6538	5387	17410	7309	2564	3526	3910	4893	3392	7243
10545	1629	3793	8492	6538	5384	17333	7308	2561	3520	3901	4893	3386	7243
10537	1629	3779	8475	6538	5384	17333	7246	2551	3520	3900	4893	3386	7241
10534	1623	3772	8475	6538	5331	17316	7227	2542	3508	3897	4893	3380	7238
10523	1623	3740	8463	6452	5331	17316	7218	2527	3505	3891	4893	3380	7234
10506	1617	3737	8443	6452	5316	17315	7216	2526	3504	3886	4893	3372	7220
10501	1617	3737	8443	6452	5316	17170	7159	2520	3503	3883	4709	3372	7220
10499	1614	3722	8436	6452	5316	17170	7159	2520	3499	3871	4709	3342	7198
10498	1593	3721	8434	6452	5316	17139	7153	2520	3488	3867	4709	3342	7198
10493	1593	3718	8422	6443	5301	17096	7130	2517	3488	3865	4709	3329	7170
10463	1592	3695	8412	6443	5301	17096	7120	2512	3483	3853	4709	3329	7170
10453	1592	3679	8385	6443	5286	17077	7111	2511	3481	3827	4709	3320	7167
10452	1588	3658	8384	6443	5286	17077	7107	2477	3461	3821	4709	3320	7159
10427	1588	3637	8384	6430	5263	17054	7105	2476	3461	3820	4709	3312	7159
10419	1587	3635	8362	6430	5263	17054	7105	2476	3448	3816	4671	3312	7156
10397	1587	3607	8350	6430	5249	17017	7091	2466	3428	3809	4671	3298	7139
10390	1582	3595	8348	6430	5249	17008	7087	2466	3423	3807	4671	3298	7135
10388	1582	3585	8307	6418	5220	16951	7080	2465	3417	3802	4671	3285	7133
10363	1580	3584	8292	6418	5220	16948	7054	2463	3417	3776	4671	3285	7133
10357	1580	3568	8284	6418	5125	16948	7045	2459	3404	3769	4671	3285	7124
10348	1573	3565	8266	6418	5125	16914	7036	2457	3392	3757	4671	3285	7120
10346	1571	3543	8254	6418	5108	16892	7002	2448	3387	3746	4510	3275	7120
10325	1571	3531	8254	6392	5108	16856	6998	2440	3376	3745	4510	3275	7113
10317	1571	3523	8247	6392	5098	16856	6994	2437	3373	3727	4510	3268	7112
10302	1566	3520	8142	6392	5098	16831	6989	2431	3367	3724	4510	3268	7112
10294	1566	3510	8106	6392	5096	16809	6976	2425	3364	3724	4510	3237	7108
10273	1559	3491	8105	6392	5096	16809	6971	2425	3359	3709	4510	3237	7108
10245	1559	3491	8104	6320	5079	16707	6967	2406	3358	3709	4510	3233	7095
10187	1544	3482	8057	6320	5079	16666	6964	2395	3328	3709	4508	3233	7092
10181	1544	3470	8040	6320	5060	16666	6962	2379	3316	3705	4508	3232	7083
10179	1543	3451	8039	6320	5060	16633	6950	2369	3315	3705	4508	3232	7079
10172	1543	3449	8039	6320	4985	16633	6940	2366	3315	3699	4508	3219	7070
10156	1538	3441	8021	6312	4985	16595	6940	2364	3310	3694	4508	3219	7063
10142	1538	3419	7985	6312	4973	16595	6933	2360	3305	3689	4508	3218	7063
10113	1531	3400	7960	6312	4973	16594	6930	2359	3301	3688	4508	3218	7061
10087	1531	3390	7913	6312	4932	16443	6929	2353	3280	3680	4495	3203	7060
10074	1530	3388	7904	6312	4932	16443	6923	2353	3270	3657	4495	3203	7052
10074	1530	3376	7879	6301	4903	16421	6902	2341	3260	3654	4495	3198	7051
10070	1517	3365	7879	6301	4903	16421	6897	2337	3259	3649	4495	3198	7038
10049	1517	3351	7876	6301	4876	16415	6892	2333	3252	3641	4495	3198	7029
10041	1516	3348	7872	6301	4876	16415	6892	2333	3231	3637	4495	3198	7017
10037	1516	3341	7865	6254	4864	16283	6891	2324	3206	3634	4495	3195	7015
10030	1509	3341	7806	6254	4864	16224	6871	2318	3187	3634	4421	3195	7002
10013	1506	3317	7794	6254	4823	16224	6860	2306	3168	3634	4421	3173	6993
9993	1504	3314	7740	6254	4823	16149	6837	2306	3168	3634	4421	3173	6993
9944	1504	3314	7672	6254	4819	16149	6827	2305	3164	3631	4421	3153	6984
9944	1497	3309	7665	6226	4819	16078	6816	2303	3159	3599	4421	3153	6984
9939	1496	3303	7648	6226	4812	16065	6786	2302	3140	3592	4421	3148	6971
9921	1496	3287	7636	6226	4812	16065	6771	2290	3135	3585	4421	3148	6971
9909	1495	3252	7636	6226	4812	16020	6767	2287	3115	3583	4280	3137	6970
9905	1495	3245	7623	6226	4812	16020	6763	2286	3112	3582	4280	3137	6970
9904	1490	3232	7623	6225	4811	15994	6747	2285	3108	3572	4280	3136	6952
9855	1490	3232	7589	6225	4811	15992	6747	2283	3105	3569	4280	3136	6944
9792	1483	3227	7580	6225	4802	15992	6736	2279	3100	3569	4280	3102	6935
9779	1483	3227	7580	6225	4802	15990	6695	2260	3082	3562	4280	3102	6927
9764	1482	3221	7552	6225	4798	15990	6685	2254	3081	3560	4280	3087	6927
9756	1482	3220	7535	6177	4798	15859	6684	2247	3046	3543	4279	3087	6926
9749	1480	3213	7514	6177	4781	15846	6679	2237	3037	3535	4279	3081	6925
9738	1479	3212	7514	6177	4781	15846	6676	2232	3034	3534	4279	3081	6920
9730	1476	3207	7514	6177	4751	15827	6669	2229	3033	3534	4279	3076	6904
9717	1476	3206	7498	6177	4751	15827	6668	2229	3017	3527	4279	3076	6904
9710	1475	3205	7472	6123	4725	15812	6657	2227	3015	3522	4279	3072	6900
9705	1475	3202	7462	6123	4725	15812	6649	2227	3012	3522	4279	3072	6900
9703	1473	3200	7436	6123	4720	15793	6641	2227	2993	3516	4279	3072	6900
9688	1471	3188	7421	6123	4720	15793	6636	2221	2971	3513	4253	3072	6900
9679	1471	3186	7419	6068	4715	15733	6633	2221	2966	3510	4253	3066	6884
9642	1470	3184	7400	6068	4715	15733	6632	2221	2963	3509	4253	3066	6884
9634	1468	3184	7379	6068	4686	15728	6629	2219	2963	3499	4253	3055	6857
9633	1468	3181	7369	6068	4686	15728	6617	2211	2918	3497	4253	3055	6857
9617	1463	3181	7356	6068	4684	15656	6597	2206	2918	3495	4253	3040	6857
9615	1463	3181	7337	6059	4684	15656	6590	2206	2901	3495	4253	3040	6850
9592	1461	3181	7322	6059	4626	15601	6581	2205	2893	3491	4186	3036	6849
9584	1458	3177	7309	6059	4626	15601	6576	2201	2891	3488	4186	3036	6848
9584	1458	3177	7309	6059	4601	15582	6570	2192	2890	3485	4186	3032	6834
9584	1451	3174	7309	6059	4601	15582	6567	2188	2871	3480	4186	3032	6818
9571	1449	3162	7307	6023	4601	15582	6566	2178	2869	3474	4186	3019	6802
9566	1449	3158	7301	6023	4601	15532	6559	2175	2866	3470	4186	3019	6800
9565	1449	3145	7271	6023	4598	15506	6548	2166	2854	3455	4186	2986	6798
9505	1442	3142	7271	6023	4598	15506	6533	2163	2833	3446	4186	2986	6798
9488	1440	3127	7250	6023	4589	15496	6530	2157	2832	3431	4185	2978	6788
9467	1436	3126	7247	6018	4589	15496	6529	2155	2818	3425	4185	2978	6770
9463	1433	3125	7229	6018	4579	15472	6521	2153	2806	3424	4185	2964	6765
9446	1433	3099	7225	6018	4579	15465	6494	2152	2803	3424	4185	2964	6745
9444	1433	3090	7214	6018	4569	15457	6491	2149	2802	3423	4185	2962	6743
9442	1427	3089	7158	5987	4569	15457	6490	2147	2792	3420	4185	2962	6743
9429	1425	3082	7158	5987	4562	15456	6488	2145	2790	3417	4185	2950	6739
9427	1425	3075	7155	5987	4562	15456	6488	2141	2783	3411	4083	2950	6738
9422	1424	3073	7131	5987	4542	15324	6461	2140	2780	3398	4083	2949	6721
9367	1424	3072	7131	5987	4542	15324	6459	2134	2777	3398	4083	2949	6721
9356	1423	3069	7103	5982	4539	15315	6457	2130	2761	3378	4083	2933	6714
9355	1423	3063	7097	5982	4539	15278	6449	2129	2757	3369	4083	2933	6712
9354	1418	3057	7089	5982	4523	15278	6438	2128	2755	3363	4083	2923	6705
9341	1418	3011	7065	5982	4523	15229	6406	2128	2753	3360	4083	2923	6703
9333	1416	3011	7061	5982	4483	15229	6404	2113	2752	3353	4083	2915	6699
9330	1416	3011	7061	5966	4483	15175	6404	2111	2752	3351	4068	2915	6697
9325	1412	3008	7058	5966	4451	15175	6389	2099	2740	3348	4068	2907	6683
9325	1412	3003	7054	5966	4451	15151	6387	2097	2731	3346	4068	2907	6682
9322	1411	3000	7053	5966	4447	15151	6385	2094	2729	3333	4068	2878	6667
9310	1411	2995	7019	5966	4447	15151	6384	2090	2728	3321	4068	2878	6665
9305	1410	2993	7011	5949	4440	15151	6383	2082	2718	3308	4068	2874	6663
9305	1410	2986	6999	5949	4440	15135	6381	2082	2716	3305	4068	2874	6659
9298	1409	2952	6973	5949	4433	15135	6380	2081	2711	3297	4063	2845	6658
9296	1409	2932	6953	5949	4433	15118	6379	2081	2703	3295	4063	2845	6658
9273	1406	2928	6936	5949	4391	15118	6368	2067	2702	3295	4063	2830	6654
9271	1406	2919	6935	5948	4391	15112	6349	2066	2694	3295	4063	2830	6654
9263	1398	2911	6935	5948	4387	15111	6339	2066	2681	3290	4063	2818	6652
9255	1398	2910	6924	5948	4387	15111	6338	2062	2674	3284	4063	2818	6632
9242	1397	2901	6882	5948	4378	15070	6338	2058	2671	3283	4063	2816	6617
9242	1394	2900	6882	5907	4378	15070	6321	2057	2667	3275	4039	2816	6614
9241	1393	2898	6834	5907	4365	15064	6317	2057	2664	3268	4039	2814	6605
9239	1393	2889	6834	5907	4365	15064	6311	2055	2640	3259	4039	2814	6605
9221	1390	2889	6832	5907	4358	15013	6304	2052	2638	3256	4039	2785	6602
9206	1383	2889	6798	5900	4358	14961	6300	2050	2632	3254	4039	2785	6598
9199	1383	2886	6788	5900	4357	14905	6292	2048	2624	3252	4039	2768	6594
9197	1378	2875	6783	5900	4357	14905	6285	2047	2623	3246	4039	2768	6591
9188	1378	2856	6769	5900	4353	14847	6278	2046	2616	3244	3968	2755	6583
9162	1371	2844	6763	5900	4353	14828	6267	2046	2605	3240	3968	2755	6583
9158	1371	2837	6743	5879	4337	14828	6266	2042	2603	3225	3968	2753	6574
9153	1371	2828	6738	5879	4337	14824	6246	2040	2594	3220	3968	2753	6574
9118	1371	2827	6682	5879	4336	14799	6239	2031	2593	3219	3968	2752	6566
9117	1370	2820	6670	5879	4336	14795	6236	2030	2591	3219	3968	2752	6543
9107	1370	2818	6627	5879	4331	14795	6225	2026	2580	3219	3968	2721	6533
9106	1369	2816	6627	5876	4331	14776	6220	2025	2575	3193	3968	2721	6533
9102	1368	2813	6617	5876	4327	14776	6208	2022	2570	3168	3967	2716	6511
9092	1368	2808	6605	5876	4327	14741	6194	2011	2569	3166	3967	2716	6488
9071	1367	2807	6605	5876	4320	14741	6180	2004	2559	3164	3967	2713	6485
9048	1367	2794	6597	5876	4320	14740	6179	2001	2552	3162	3967	2713	6485
9039	1364	2790	6593	5806	4301	14740	6167	2001	2549	3153	3967	2700	6482
9034	1364	2787	6577	5806	4301	14682	6164	2001	2548	3152	3967	2700	6480
9029	1363	2772	6577	5806	4291	14682	6155	1995	2544	3150	3967	2698	6480
9027	1363	2767	6558	5806	4291	14666	6154	1992	2518	3149	3945	2698	6477
9022	1363	2744	6548	5806	4284	14666	6151	1991	2516	3144	3945	2681	6466
9020	1363	2734	6546	5801	4284	14654	6143	1986	2506	3133	3945	2681	6464
9015	1363	2733	6544	5801	4276	14654	6141	1981	2482	3125	3945	2671	6458
9013	1360	2726	6519	5801	4276	14654	6140	1977	2481	3122	3945	2671	6453
9005	1360	2725	6517	5801	4275	14636	6133	1971	2481	3121	3945	2669	6447
8992	1359	2725	6516	5737	4275	14636	6129	1969	2476	3121	3945	2669	6446
8987	1359	2713	6511	5737	4269	14622	6117	1963	2461	3120	3945	2641	6444
8977	1350	2707	6505	5737	4269	14622	6110	1959	2437	3119	3880	2641	6437
8959	1350	2702	6500	5737	4260	14604	6106	1959	2435	3115	3880	2641	6437
8934	1336	2690	6450	5737	4260	14604	6102	1958	2435	3115	3880	2641	6437
8934	1336	2685	6450	5734	4248	14580	6100	1955	2434	3114	3880	2640	6437
8920	1336	2659	6443	5734	4248	14570	6095	1949	2414	3107	3880	2640	6430
8916	1331	2656	6443	5734	4237	14552	6094	1946	2414	3104	3880	2634	6430
8892	1329	2652	6443	5734	4237	14552	6077	1945	2409	3097	3880	2634	6429
8890	1329	2643	6428	5687	4230	14538	6063	1937	2409	3074	3880	2611	6420
8861	1329	2643	6428	5687	4230	14538	6048	1936	2405	3073	3854	2611	6420
8851	1327	2635	6427	5687	4214	14535	6046	1933	2405	3066	3854	2608	6409
8851	1326	2629	6423	5687	4214	14535	6040	1924	2404	3065	3854	2608	6409
8845	1326	2628	6416	5675	4204	14522	6034	1924	2398	3061	3854	2606	6405
8845	1326	2626	6411	5675	4204	14522	6033	1922	2386	3055	3854	2606	6382
8844	1325	2626	6389	5675	4201	14491	6029	1921	2373	3050	3854	2561	6379
8839	1322	2622	6359	5675	4201	14491	6017	1916	2360	3042	3854	2561	6379
8836	1318	2617	6348	5660	4184	14473	6005	1912	2354	3033	3854	2559	6366
8831	1318	2617	6346	5660	4184	14454	6004	1911	2351	3024	3850	2559	6366
8827	1317	2612	6317	5660	4183	14454	6004	1908	2349	3014	3850	2553	6363
8824	1316	2594	6310	5660	4183	14423	6004	1907	2338	3008	3850	2553	6351
8809	1316	2591	6310	5660	4181	14418	6001	1903	2337	3005	3850	2544	6345
8803	1315	2584	6294	5637	4181	14418	6000	1894	2335	3000	3850	2544	6335
8798	1309	2579	6278	5637	4160	14399	5996	1890	2325	2999	3850	2542	6335
8797	1309	2574	6271	5637	4160	14399	5992	1889	2315	2978	3850	2542	6326
8796	1308	2564	6271	5637	4152	14373	5977	1884	2302	2967	3850	2539	6319
8795	1308	2557	6228	5637	4152	14370	5965	1884	2294	2966	3826	2539	6317
8789	1308	2546	6202	5535	4144	14370	5962	1880	2289	2959	3826	2534	6314
8757	1308	2530	6196	5535	4144	14358	5950	1877	2278	2957	3826	2534	6310
8754	1307	2524	6176	5535	4133	14333	5947	1875	2277	2957	3826	2534	6301
8748	1307	2514	6138	5535	4133	14333	5937	1862	2271	2956	3826	2534	6301
8740	1304	2513	6122	5535	4131	14324	5934	1860	2267	2944	3826	2510	6301
8740	1304	2512	6114	5531	4131	14324	5928	1859	2261	2943	3826	2510	6292
8739	1302	2503	6095	5531	4106	14297	5925	1859	2253	2942	3809	2510	6292
8735	1298	2502	6082	5531	4106	14273	5919	1858	2253	2937	3809	2510	6292
8716	1296	2498	6082	5531	4106	14273	5911	1853	2244	2937	3809	2497	6291
8712	1295	2492	6079	5514	4106	14065	5911	1852	2225	2936	3809	2497	6276
8711	1295	2487	6079	5514	4093	14065	5900	1847	2224	2932	3809	2490	6275
8705	1290	2482	6053	5514	4093	14043	5898	1847	2224	2931	3809	2490	6272
8677	1288	2473	6053	5514	4063	14043	5890	1845	2216	2929	3809	2483	6272
8669	1288	2467	6047	5486	4063	14012	5889	1843	2215	2926	3809	2483	6270
8669	1286	2454	6034	5486	4052	14009	5868	1843	2210	2924	3781	2464	6270
8652	1285	2450	6025	5486	4052	14009	5867	1837	2203	2921	3781	2464	6268
8645	1282	2443	6021	5486	4037	13936	5859	1837	2202	2920	3781	2464	6268
8641	1282	2439	6011	5486	4037	13936	5857	1830	2197	2912	3781	2464	6268
8629	1281	2436	5934	5483	4032	13872	5847	1830	2194	2912	3781	2459	6267
8621	1281	2435	5930	5483	4032	13872	5837	1825	2187	2906	3781	2459	6264
8617	1278	2431	5925	5483	4022	13828	5824	1824	2187	2906	3781	2458	6255
8610	1278	2415	5903	5483	4022	13828	5818	1823	2179	2901	3781	2458	6255
8603	1271	2413	5903	5483	3992	13739	5811	1822	2168	2900	3759	2447	6248
8597	1264	2411	5882	5397	3992	13719	5807	1813	2161	2887	3759	2447	6248
8581	1262	2406	5866	5397	3987	13719	5805	1812	2160	2883	3759	2424	6248
8580	1262	2405	5854	5397	3987	13716	5792	1808	2150	2880	3759	2424	6247
8572	1262	2404	5850	5397	3982	13716	5792	1804	2142	2875	3759	2401	6247
8561	1262	2404	5844	5397	3982	13703	5791	1792	2142	2866	3759	2401	6245
8559	1261	2404	5844	5357	3964	13692	5790	1788	2127	2864	3759	2401	6239
8558	1259	2403	5832	5357	3964	13692	5786	1785	2126	2862	3759	2401	6229
8556	1259	2399	5827	5357	3955	13579	5772	1785	2124	2862	3717	2395	6228
8553	1257	2395	5820	5357	3955	13577	5759	1780	2122	2847	3717	2395	6228
8550	1256	2395	5796	5357	3951	13421	5736	1780	2120	2844	3717	2377	6217
8550	1248	2376	5794	5336	3951	13421	5732	1780	2118	2839	3717	2377	6217
8539	1248	2372	5780	5336	3950	13401	5725	1778	2116	2838	3717	2365	6190
8535	1247	2372	5768	5336	3950	13401	5725	1778	2116	2832	3717	2365	6190
8515	1247	2343	5766	5336	3949	13375	5723	1773	2115	2828	3717	2358	6183
8499	1240	2342	5766	5336	3949	13375	5716	1772	2114	2825	3717	2358	6179
8497	1238	2327	5720	5323	3948	13369	5714	1771	2113	2799	3706	2356	6179
8485	1236	2324	5720	5323	3948	13366	5703	1768	2112	2797	3706	2356	6146
8466	1232	2304	5661	5323	3946	13355	5693	1765	2109	2796	3706	2355	6145
8464	1232	2293	5647	5323	3946	13335	5670	1761	2108	2788	3706	2355	6123
8461	1231	2290	5639	5323	3944	13335	5664	1760	2105	2788	3706	2352	6122
8455	1231	2283	5636	5320	3944	13308	5664	1754	2100	2779	3706	2352	6119
8452	1230	2271	5604	5320	3938	13289	5661	1747	2085	2777	3706	2352	6118
8448	1226	2271	5594	5320	3938	13289	5659	1744	2078	2774	3682	2352	6108
8448	1226	2267	5484	5320	3921	13168	5657	1738	2074	2762	3682	2347	6105
8440	1226	2266	5480	5320	3921	13168	5655	1729	2067	2762	3682	2347	6090
8430	1225	2261	5478	5230	3921	13133	5647	1729	2065	2760	3682	2346	6082
8416	1225	2248	5460	5230	3921	13133	5628	1721	2062	2760	3682	2346	6079
8389	1225	2244	5424	5230	3898	13010	5624	1714	2054	2758	3682	2346	6061
8384	1222	2243	5417	5230	3898	12968	5619	1712	2046	2756	3682	2346	6061
8373	1222	2243	5409	5175	3889	12968	5618	1706	1988	2752	3682	2340	6046
8369	1221	2226	5408	5175	3889	12956	5618	1704	1987	2751	3672	2340	6044
8364	1221	2223	5407	5175	3887	12956	5617	1701	1983	2749	3672	2340	6036
8360	1221	2220	5402	5175	3887	12912	5611	1701	1981	2749	3672	2340	6036
8360	1220	2206	5401	5161	3886	12912	5605	1695	1976	2730	3672	2339	6034
8349	1214	2201	5389	5161	3886	12842	5598	1691	1972	2730	3672	2339	6033
8341	1214	2201	5389	5161	3884	12842	5598	1687	1972	2722	3672	2338	6017
8333	1214	2194	5380	5161	3884	12839	5575	1686	1967	2718	3672	2338	6017
8327	1211	2194	5363	5161	3859	12806	5566	1682	1962	2718	3597	2336	6005
8311	1210	2194	5332	5155	3859	12806	5560	1682	1952	2716	3597	2336	6005
8301	1210	2192	5311	5155	3858	12746	5556	1681	1941	2712	3597	2319	5991
8300	1208	2190	5293	5155	3858	12746	5547	1680	1938	2712	3597	2319	5991
8297	1202	2189	5284	5155	3855	12722	5529	1679	1937	2711	3597	2316	5985
8294	1199	2186	5281	5155	3855	12722	5525	1676	1933	2711	3597	2316	5985
8291	1197	2179	5281	5139	3849	12632	5513	1675	1930	2709	3597	2316	5982
8268	1197	2179	5280	5139	3849	12632	5512	1675	1925	2706	3597	2316	5979
8268	1197	2170	5279	5139	3835	12630	5505	1665	1924	2705	3531	2314	5975
8268	1196	2155	5238	5139	3835	12630	5505	1663	1923	2702	3531	2314	5974
8253	1194	2155	5233	5139	3820	12616	5502	1661	1921	2693	3531	2313	5968
8252	1194	2152	5228	5035	3820	12616	5489	1657	1917	2686	3531	2313	5967
8227	1191	2149	5225	5035	3784	12580	5484	1656	1916	2686	3531	2303	5964
8217	1191	2144	5212	5035	3784	12577	5483	1655	1911	2682	3531	2303	5964
8196	1188	2144	5205	5035	3782	12577	5471	1652	1910	2679	3531	2296	5939
8194	1188	2142	5205	5035	3782	12525	5453	1650	1907	2674	3531	2296	5926
8183	1188	2119	5190	5027	3767	12523	5453	1642	1904	2663	3522	2283	5925
8173	1184	2119	5189	5027	3767	12523	5451	1635	1903	2656	3522	2283	5917
8166	1183	2118	5164	5027	3753	12510	5441	1634	1902	2655	3522	2272	5915
8161	1183	2117	5160	5027	3753	12510	5436	1634	1897	2654	3522	2272	5911
8155	1181	2117	5153	5027	3735	12506	5433	1626	1882	2650	3522	2266	5910
8154	1181	2108	5139	5017	3735	12453	5430	1624	1881	2649	3522	2266	5907
8154	1181	2098	5112	5017	3729	12453	5430	1620	1878	2645	3522	2264	5907
8154	1179	2094	5102	5017	3729	12435	5421	1610	1872	2637	3522	2264	5905
8150	1179	2093	5088	5017	3727	12435	5420	1605	1866	2637	3516	2262	5901
8126	1177	2092	5072	5017	3727	12376	5420	1602	1860	2633	3516	2262	5900
8123	1177	2070	5064	4989	3713	12376	5418	1598	1854	2633	3516	2256	5896
8119	1175	2066	5057	4989	3713	12305	5418	1597	1854	2622	3516	2256	5895
8108	1175	2065	5053	4989	3658	12305	5408	1597	1848	2622	3516	2245	5881
8107	1172	2065	5053	4989	3658	12269	5407	1592	1848	2620	3516	2245	5879
8106	1172	2061	5046	4989	3655	12269	5405	1589	1845	2604	3516	2242	5879
8089	1170	2047	5046	4916	3655	12245	5392	1565	1843	2601	3516	2242	5870
8086	1170	2046	5041	4916	3653	12245	5385	1565	1839	2598	3481	2242	5870
8082	1167	2044	5041	4916	3653	12200	5385	1562	1839	2595	3481	2242	5863
8063	1167	2043	5023	4916	3629	12200	5385	1561	1831	2593	3481	2234	5858
8059	1166	2042	5023	4916	3629	12138	5384	1561	1830	2590	3481	2234	5857
8049	1166	2029	4983	4896	3615	12138	5384	1560	1828	2589	3481	2231	5854
8041	1165	2022	4963	4896	3615	12066	5378	1556	1824	2583	3481	2231	5854
8039	1165	2021	4963	4896	3612	12066	5376	1554	1820	2583	3481	2226	5836
8032	1165	2014	4928	4896	3612	12060	5369	1550	1801	2570	3481	2226	5836
8022	1164	2014	4895	4896	3611	12013	5359	1546	1793	2570	3425	2210	5825
8021	1164	2010	4892	4873	3611	12013	5358	1543	1781	2569	3425	2210	5825
8018	1162	2009	4881	4873	3601	11989	5354	1543	1777	2569	3425	2207	5823
8016	1160	2001	4864	4873	3601	11896	5352	1541	1768	2565	3425	2207	5820
8006	1159	1991	4839	4873	3558	11880	5351	1541	1766	2564	3425	2201	5810
7996	1157	1984	4816	4873	3558	11880	5343	1538	1762	2564	3425	2201	5809
7994	1157	1984	4775	4850	3551	11877	5333	1535	1751	2562	3425	2199	5806
7988	1151	1974	4775	4850	3551	11838	5331	1533	1749	2558	3403	2199	5806
7987	1151	1968	4772	4850	3521	11838	5326	1531	1743	2556	3403	2197	5799
7979	1147	1966	4768	4850	3521	11767	5319	1530	1734	2552	3403	2197	5799
7979	1145	1966	4765	4850	3509	11767	5319	1530	1733	2552	3403	2195	5795
7976	1145	1960	4762	4846	3509	11730	5314	1522	1723	2552	3403	2195	5787
7976	1141	1960	4755	4846	3486	11730	5312	1515	1716	2550	3403	2193	5780
7974	1141	1959	4755	4846	3486	11709	5311	1515	1711	2538	3403	2193	5761
7958	1140	1957	4755	4846	3485	11709	5310	1510	1710	2533	3403	2191	5755
7956	1140	1955	4752	4846	3485	11685	5305	1508	1709	2517	3377	2191	5753
7955	1139	1954	4698	4787	3474	11685	5297	1508	1707	2508	3377	2168	5753
7952	1139	1950	4686	4787	3474	11599	5296	1508	1701	2508	3377	2168	5741
7947	1132	1950	4662	4787	3468	11581	5291	1497	1693	2507	3377	2163	5741
7932	1132	1949	4652	4787	3468	11581	5272	1495	1688	2504	3377	2163	5738
7928	1132	1937	4647	4787	3468	11518	5262	1488	1683	2501	3377	2162	5736
7923	1130	1936	4640	4733	3464	11518	5260	1487	1670	2497	3377	2162	5717
7909	1130	1930	4623	4733	3460	11452	5258	1484	1657	2495	3375	2160	5714
7904	1130	1925	4620	4733	3460	11239	5251	1480	1656	2493	3375	2160	5714
7901	1128	1923	4612	4733	3454	11209	5243	1480	1644	2491	3375	2150	5706
7897	1128	1919	4603	4733	3453	11209	5233	1480	1643	2486	3375	2150	5704
7894	1127	1918	4579	4678	3453	11130	5224	1478	1640	2486	3375	2150	5700
7891	1127	1910	4552	4678	3442	11130	5222	1474	1632	2480	3375	2150	5697
7890	1121	1909	4542	4678	3437	11116	5220	1472	1616	2472	3375	2139	5694
7880	1121	1891	4507	4678	3433	11116	5219	1472	1601	2467	3375	2139	5688
7867	1121	1886	4496	4602	3433	11087	5216	1472	1601	2467	3343	2136	5678
7863	1121	1885	4477	4602	3423	11087	5213	1471	1597	2467	3343	2136	5675
7859	1118	1885	4473	4602	3415	11016	5205	1471	1592	2458	3343	2130	5675
7856	1115	1883	4472	4602	3412	11016	5204	1469	1583	2457	3343	2130	5675
7838	1104	1858	4466	4602	3406	10844	5200	1469	1572	2456	3343	2129	5675
7837	1104	1849	4457	4601	3390	10820	5195	1467	1572	2450	3343	2129	5674
7836	1099	1847	4452	4601	3390	10820	5192	1467	1570	2449	3343	2124	5666
7835	1098	1847	4450	4601	3374	10669	5178	1466	1564	2446	3330	2124	5666
7834	1098	1837	4448	4601	3365	10669	5170	1465	1562	2446	3330	2116	5651
7830	1098	1827	4442	4601	3360	10637	5170	1460	1557	2437	3330	2116	5651
7806	1098	1825	4440	4598	3351	10637	5168	1459	1555	2422	3330	2104	5650
7803	1097	1815	4419	4598	3347	10597	5166	1458	1549	2418	3330	2104	5650
7794	1097	1810	4411	4598	3333	10597	5166	1457	1544	2416	3330	2087	5644
7787	1097	1801	4411	4598	3330	10588	5165	1453	1544	2415	3330	2087	5642
7785	1097	1798	4406	4598	3316	10438	5158	1452	1539	2407	3330	2085	5642
7781	1097	1795	4396	4557	3312	10438	5158	1451	1537	2406	3328	2085	5637
7779	1097	1787	4392	4557	3306	10415	5152	1450	1524	2406	3328	2076	5637
7768	1095	1786	4384	4557	3296	10389	5127	1448	1516	2397	3328	2076	5634
7766	1095	1781	4380	4557	3273	10369	5126	1445	1511	2395	3328	2072	5626
7758	1088	1771	4371	4557	3271	10369	5124	1440	1509	2392	3328	2072	5620
7754	1088	1765	4371	4521	3267	10367	5122	1437	1508	2390	3328	2070	5613
7743	1085	1758	4361	4521	3261	10362	5109	1437	1505	2388	3328	2070	5613
7736	1084	1757	4360	4521	3250	10362	5105	1435	1492	2384	3295	2065	5611
7735	1084	1742	4359	4521	3244	10227	5103	1433	1490	2373	3295	2065	5610
7732	1083	1741	4325	4521	3214	10227	5101	1426	1487	2349	3295	2040	5610
7731	1083	1740	4322	4501	3210	10188	5094	1425	1484	2348	3295	2040	5600
7727	1083	1740	4322	4501	3206	10188	5092	1424	1483	2343	3295	2026	5600
7709	1082	1733	4309	4501	3204	10088	5084	1422	1478	2341	3295	2026	5594
7709	1081	1715	4305	4501	3203	10057	5082	1419	1474	2332	3295	2023	5588
7703	1081	1711	4288	4501	3197	10057	5079	1409	1472	2330	3238	2023	5588
7697	1080	1711	4288	4464	3194	10051	5075	1407	1470	2327	3238	2016	5587
7693	1076	1709	4279	4464	3188	10051	5074	1403	1469	2314	3238	2016	5585
7690	1073	1705	4277	4464	3185	10002	5066	1402	1468	2308	3238	2015	5582
7689	1073	1703	4277	4464	3180	9910	5065	1400	1466	2295	3238	2015	5582
7681	1073	1696	4274	4464	3170	9885	5056	1395	1461	2287	3238	2015	5568
7670	1072	1694	4259	4460	3164	9885	5053	1385	1458	2285	3238	2015	5557
7667	1072	1682	4259	4460	3164	9805	5050	1384	1456	2281	3238	2010	5551
7660	1072	1679	4243	4460	3162	9805	5044	1384	1454	2280	3233	2010	5551
7630	1071	1672	4243	4460	3150	9805	5043	1380	1450	2277	3233	1999	5547
7627	1070	1672	4225	4460	3149	9750	5041	1372	1447	2274	3233	1999	5540
7625	1070	1671	4204	4445	3149	9732	5038	1371	1443	2269	3233	1982	5537
7610	1070	1664	4183	4445	3148	9732	5035	1370	1439	2248	3233	1982	5537
7586	1070	1662	4173	4445	3133	9726	5031	1370	1436	2229	3233	1970	5537
7585	1067	1661	4151	4445	3131	9726	5028	1368	1435	2228	3233	1970	5534
7573	1065	1659	4125	4445	3125	9724	5024	1367	1434	2223	3205	1969	5532
7570	1065	1654	4079	4443	3125	9724	5021	1365	1431	2213	3205	1969	5532
7567	1064	1648	4076	4443	3119	9618	5020	1363	1428	2208	3205	1966	5532
7556	1064	1622	4048	4443	3106	9618	5018	1361	1421	2206	3205	1966	5522
7556	1062	1613	4039	4443	3095	9570	5013	1361	1421	2201	3205	1965	5522
7553	1062	1612	4035	4443	3094	9570	5011	1361	1419	2193	3205	1965	5521
7553	1061	1602	4013	4348	3094	9551	5008	1361	1418	2189	3205	1958	5514
7550	1058	1598	4000	4348	3079	9551	5008	1360	1404	2189	3205	1958	5507
7550	1058	1597	4000	4348	3077	9457	5005	1358	1394	2189	3191	1956	5507
7542	1056	1596	3999	4348	3073	9457	5004	1358	1390	2186	3191	1956	5506
7540	1056	1592	3986	4326	3070	9273	5000	1357	1383	2172	3191	1951	5505
7528	1056	1589	3985	4326	3053	9273	4998	1352	1382	2165	3191	1951	5505
7525	1054	1588	3982	4326	3049	9261	4996	1352	1381	2162	3191	1946	5499
7524	1054	1588	3970	4326	3039	9261	4993	1350	1377	2162	3191	1946	5493
7522	1052	1586	3962	4326	3027	9248	4989	1349	1369	2155	3191	1942	5491
7522	1051	1584	3955	4166	3021	9248	4974	1346	1366	2155	3177	1942	5490
7515	1051	1580	3934	4166	3013	9225	4972	1324	1361	2154	3177	1941	5487
7512	1050	1579	3901	4166	3011	9225	4967	1322	1360	2153	3177	1941	5485
7504	1047	1578	3891	4166	3009	9166	4957	1318	1360	2138	3177	1936	5463
7503	1046	1578	3858	4166	3001	9102	4957	1318	1357	2137	3177	1936	5457
7503	1046	1577	3839	4145	3000	9102	4946	1316	1354	2135	3177	1933	5444
7501	1046	1575	3821	4145	2996	9086	4943	1314	1347	2128	3177	1933	5433
7494	1046	1569	3817	4145	2993	9086	4940	1313	1340	2119	3177	1928	5433
7487	1044	1564	3816	4145	2989	9086	4926	1308	1338	2119	3071	1928	5431
7485	1044	1558	3805	4145	2972	9086	4916	1307	1333	2111	3071	1927	5427
7476	1043	1551	3804	4127	2959	9042	4900	1306	1333	2109	3071	1927	5422
7473	1043	1551	3784	4127	2956	8952	4899	1301	1332	2104	3071	1896	5418
7470	1042	1539	3784	4127	2949	8865	4895	1300	1327	2103	3071	1896	5418
7465	1040	1529	3778	4127	2943	8730	4891	1297	1326	2103	3071	1892	5417
7463	1040	1528	3770	4127	2941	8730	4883	1295	1326	2103	3071	1892	5417
7451	1039	1527	3763	4071	2932	8601	4878	1294	1319	2094	3071	1880	5410
7443	1039	1524	3739	4071	2919	8601	4877	1293	1318	2093	3016	1880	5395
7441	1038	1516	3729	4071	2904	8581	4869	1288	1317	2082	3016	1872	5390
7439	1034	1512	3728	4071	2897	8483	4863	1281	1316	2076	3016	1872	5388
7433	1034	1506	3728	4071	2893	8483	4857	1278	1312	2074	3016	1871	5386
7429	1032	1495	3705	4070	2893	8398	4855	1273	1309	2074	3016	1871	5386
7427	1030	1494	3705	4070	2877	8398	4855	1265	1305	2070	3016	1862	5379
7407	1030	1494	3686	4070	2858	8358	4854	1264	1301	2070	3016	1862	5379
7397	1029	1491	3668	4070	2857	8358	4850	1263	1297	2067	3000	1849	5375
7394	1029	1478	3645	4068	2850	8289	4844	1263	1290	2061	3000	1849	5370
7392	1028	1475	3636	4068	2848	8289	4843	1263	1282	2061	3000	1840	5367
7388	1028	1465	3621	4068	2846	8138	4838	1262	1271	2060	3000	1840	5367
7380	1022	1461	3610	4068	2836	8138	4829	1262	1269	2060	3000	1837	5362
7371	1022	1453	3608	4056	2836	7733	4828	1261	1268	2055	3000	1837	5361
7363	1022	1452	3577	4056	2831	7733	4827	1259	1266	2054	3000	1836	5361
7351	1022	1451	3561	4056	2830	7728	4824	1255	1266	2045	3000	1836	5347
7347	1019	1447	3561	4056	2830	7728	4823	1254	1265	2045	2996	1830	5328
7346	1019	1445	3541	4056	2801	7717	4823	1254	1265	2044	2996	1830	5308
7341	1011	1445	3537	4046	2796	7717	4820	1253	1260	2044	2996	1829	5296
7340	1011	1445	3537	4046	2794	7698	4815	1251	1258	2041	2996	1829	5277
7339	1011	1439	3508	4046	2792	7341	4814	1249	1257	2036	2996	1826	5273
7322	1006	1437	3505	4046	2786	7341	4808	1249	1257	2033	2996	1826	5264
7319	1006	1434	3500	4046	2771	7307	4807	1248	1255	2033	2996	1821	5260
7316	1005	1430	3489	4037	2770	7261	4801	1248	1252	2032	2996	1821	5243
7316	1003	1430	3460	4037	2767	7261	4800	1244	1250	2032	2935	1808	5240
7316	1003	1424	3445	4037	2766	7156	4799	1244	1243	2032	2935	1808	5240
7309	1003	1423	3434	4037	2766	6999	4789	1244	1240	2028	2935	1801	5225
7304	1003	1420	3430	4037	2756	6999	4788	1240	1232	2019	2935	1801	5223
7303	1002	1420	3428	3965	2743	6763	4782	1239	1232	2018	2935	1793	5220
7302	1001	1417	3428	3965	2737	6763	4777	1239	1231	2012	2935	1793	5218
7300	999	1416	3410	3965	2731	6740	4776	1237	1230	2010	2935	1785	5205
7297	999	1416	3410	3965	2722	6740	4759	1235	1226	2009	2935	1785	5178
7296	998	1414	3397	3965	2717	6672	4751	1233	1226	2005	2826	1779	5178
7295	998	1410	3391	3924	2708	6672	4750	1232	1224	2003	2826	1779	5175
7292	998	1409	3387	3924	2703	6669	4740	1230	1221	1999	2826	1765	5170
7291	998	1408	3380	3924	2682	6669	4731	1229	1221	1999	2826	1765	5170
7289	998	1407	3376	3924	2680	6510	4713	1226	1216	1984	2826	1744	5150
7287	997	1407	3352	3924	2676	6359	4710	1225	1216	1974	2826	1744	5141
7284	997	1404	3348	3911	2671	6359	4701	1225	1209	1961	2826	1734	5130
7277	994	1404	3324	3911	2670	6164	4700	1223	1203	1957	2791	1734	5127
7254	994	1403	3323	3911	2665	6164	4698	1223	1203	1951	2791	1732	5125
7251	994	1402	3319	3911	2659	5991	4693	1220	1202	1943	2791	1732	5120
7251	994	1383	3317	3911	2638	5987	4691	1220	1197	1942	2791	1728	5100
7244	994	1378	3314	3902	2635	5987	4689	1219	1196	1934	2791	1728	5097
7244	994	1378	3314	3902	2634	5652	4687	1219	1193	1930	2791	1726	5097
7244	991	1377	3314	3902	2631	5558	4687	1219	1191	1927	2791	1726	5092
7234	991	1370	3302	3902	2611	5449	4683	1218	1189	1927	2791	1725	5079
7230	991	1369	3302	3902	2609	5449	4679	1216	1185	1921	2771	1725	5069
7219	991	1366	3292	3890	2604	5377	4669	1214	1184	1911	2771	1720	5066
7215	990	1349	3286	3890	2574	5343	4669	1214	1183	1905	2771	1720	5065
7213	985	1347	3277	3890	2564	5343	4662	1210	1182	1892	2771	1717	5062
7210	985	1346	3247	3890	2548	5049	4643	1210	1179	1886	2771	1717	5062
7199	985	1341	3219	3890	2547	4989	4643	1208	1174	1886	2771	1715	5059
7195	984	1339	3210	3879	2547	4989	4632	1206	1170	1878	2771	1715	5051
7193	984	1336	3203	3879	2540	4964	4620	1206	1168	1871	2771	1715	5021
7189	984	1324	3201	3879	2536	4964	4616	1206	1164	1868	2660	1715	5015
7175	981	1321	3201	3879	2523	4955	4605	1202	1150	1863	2660	1713	5009
7168	981	1321	3197	3879	2520	4955	4604	1201	1148	1863	2660	1713	5004
7154	981	1321	3195	3860	2497	4909	4601	1193	1143	1856	2660	1713	5004
7144	981	1318	3191	3860	2488	4909	4599	1192	1139	1847	2660	1713	5001
7135	979	1314	3182	3860	2488	4806	4593	1190	1138	1840	2660	1704	5001
7126	979	1311	3179	3860	2484	4796	4593	1187	1135	1831	2660	1704	4975
7124	979	1308	3177	3860	2478	4796	4591	1185	1127	1829	2660	1700	4964
7123	978	1288	3173	3849	2472	4790	4588	1185	1127	1803	2640	1700	4964
7121	977	1288	3167	3849	2451	4790	4587	1179	1127	1801	2640	1697	4959
7119	977	1288	3167	3849	2430	4751	4586	1179	1125	1798	2640	1697	4948
7115	976	1285	3152	3849	2423	4625	4585	1176	1122	1795	2640	1696	4945
7114	976	1284	3135	3849	2409	4576	4579	1173	1118	1791	2640	1696	4933
7109	976	1281	3125	3816	2407	4576	4578	1173	1112	1789	2640	1676	4922
7108	976	1280	3096	3816	2385	4563	4575	1173	1111	1788	2640	1676	4918
7107	972	1280	3093	3816	2380	4563	4570	1172	1107	1787	2640	1675	4918
7105	972	1277	3093	3816	2364	4503	4567	1170	1105	1787	2583	1675	4918
7103	971	1270	3082	3816	2358	4378	4563	1169	1105	1775	2583	1669	4910
7102	968	1268	3082	3720	2357	4378	4559	1169	1105	1774	2583	1669	4910
7099	966	1267	3070	3720	2352	4339	4558	1168	1104	1771	2583	1646	4903
7096	966	1266	3069	3720	2345	4266	4556	1166	1101	1762	2583	1646	4902
7094	966	1257	3054	3720	2332	4266	4548	1164	1100	1751	2583	1644	4895
7092	965	1248	3048	3720	2323	4229	4546	1161	1100	1748	2583	1644	4883
7077	963	1238	3032	3712	2313	4222	4544	1159	1096	1742	2583	1643	4879
7067	963	1232	3032	3712	2313	4222	4537	1159	1095	1739	2518	1643	4878
7061	963	1217	3026	3712	2312	4035	4533	1158	1094	1738	2518	1643	4858
7057	963	1205	2990	3712	2309	3996	4531	1155	1085	1737	2518	1643	4851
7055	963	1202	2990	3712	2299	3996	4528	1153	1080	1736	2518	1639	4843
7046	963	1193	2977	3696	2288	3983	4526	1151	1077	1725	2518	1639	4843
7042	961	1193	2962	3696	2274	3983	4523	1147	1076	1723	2518	1633	4831
7037	961	1187	2951	3696	2274	3968	4516	1146	1072	1722	2518	1633	4822
7020	960	1183	2927	3696	2273	3968	4511	1144	1071	1722	2518	1630	4818
7011	955	1181	2927	3696	2267	3876	4504	1143	1064	1721	2394	1630	4816
7011	953	1176	2921	3694	2253	3825	4500	1139	1063	1721	2394	1611	4816
7005	953	1176	2921	3694	2252	3794	4497	1139	1059	1713	2394	1611	4811
7001	951	1174	2907	3694	2250	3794	4496	1132	1058	1712	2394	1610	4811
7001	948	1161	2899	3694	2248	3722	4494	1131	1047	1706	2394	1610	4792
6992	948	1145	2882	3678	2238	3722	4484	1130	1045	1704	2394	1608	4792
6990	946	1143	2853	3678	2223	3680	4481	1129	1043	1700	2394	1608	4774
6980	946	1138	2850	3678	2220	3662	4481	1126	1042	1699	2394	1591	4768
6967	942	1137	2850	3678	2217	3662	4475	1125	1034	1691	2257	1591	4755
6956	942	1135	2849	3678	2217	3629	4468	1121	1033	1688	2257	1583	4755
6949	942	1128	2849	3577	2216	3629	4460	1118	1029	1684	2257	1583	4752
6946	942	1122	2836	3577	2200	3610	4460	1118	1026	1684	2257	1575	4744
6943	938	1118	2832	3577	2197	3530	4458	1117	1025	1682	2257	1575	4739
6938	929	1115	2826	3577	2196	3530	4452	1107	1025	1680	2257	1567	4711
6930	929	1082	2826	3577	2192	3469	4445	1106	1023	1678	2257	1567	4708
6917	929	1081	2824	3568	2190	3433	4445	1104	1023	1672	2234	1563	4708
6902	929	1078	2810	3568	2189	3359	4439	1102	1014	1664	2234	1563	4702
6898	929	1073	2806	3568	2184	3284	4435	1101	1012	1661	2234	1561	4701
6893	928	1071	2804	3568	2184	3260	4430	1101	1009	1658	2234	1561	4700
6892	928	1062	2801	3530	2174	3260	4428	1100	1006	1656	2234	1557	4684
6890	923	1056	2792	3530	2164	3236	4423	1100	1005	1655	2234	1557	4677
6879	923	1049	2792	3530	2155	3236	4414	1093	1001	1655	2234	1540	4675
6875	919	1047	2777	3530	2152	3194	4410	1092	1000	1655	2234	1540	4673
6875	919	1039	2777	3530	2151	3194	4404	1088	996	1653	2230	1533	4660
6873	918	1034	2772	3512	2150	3176	4396	1087	995	1643	2230	1533	4644
6872	917	1029	2722	3512	2147	3176	4396	1086	993	1630	2230	1523	4641
6863	917	1027	2721	3512	2143	3173	4387	1085	991	1630	2230	1523	4639
6852	916	1027	2714	3512	2136	3160	4378	1085	988	1624	2230	1522	4639
6852	915	1020	2693	3512	2128	3160	4378	1085	986	1623	2230	1522	4634
6849	915	1018	2691	3463	2120	3123	4372	1084	984	1617	2230	1506	4634
6839	913	1015	2691	3463	2112	3097	4368	1083	984	1610	2230	1506	4620
6837	911	1015	2684	3463	2099	3097	4368	1080	984	1609	2150	1498	4620
6834	910	1012	2680	3463	2094	3090	4360	1074	981	1606	2150	1498	4592
6830	910	1007	2672	3463	2080	3090	4354	1074	978	1604	2150	1482	4585
6818	909	1002	2672	3396	2063	3020	4345	1074	976	1603	2150	1482	4584
6817	909	1002	2667	3396	2060	3020	4343	1072	971	1587	2150	1480	4562
6809	908	994	2663	3396	2058	2994	4340	1070	971	1584	2150	1480	4558
6798	908	990	2659	3396	2055	2960	4328	1067	956	1574	2150	1475	4558
6795	907	982	2641	3396	2049	2943	4327	1062	954	1574	2142	1475	4549
6790	906	978	2625	3394	2046	2942	4326	1061	951	1573	2142	1473	4543
6788	905	975	2615	3394	2023	2940	4323	1061	951	1570	2142	1473	4528
6788	905	970	2605	3394	2017	2940	4309	1056	945	1569	2142	1472	4518
6787	903	968	2605	3394	2016	2806	4304	1054	944	1563	2142	1472	4492
6786	901	968	2605	3394	2016	2806	4304	1043	940	1562	2142	1468	4492
6785	901	967	2595	3391	2004	2805	4299	1040	926	1562	2142	1468	4458
6785	900	966	2587	3391	2003	2805	4298	1039	922	1560	2105	1457	4452
6777	899	963	2581	3391	1991	2798	4279	1036	915	1554	2105	1457	4435
6775	898	962	2574	3391	1989	2798	4273	1036	915	1554	2105	1454	4432
6767	898	960	2572	3391	1981	2755	4271	1035	914	1554	2105	1454	4426
6750	895	959	2572	3312	1963	2755	4266	1033	914	1546	2105	1442	4425
6749	894	957	2557	3312	1962	2641	4266	1033	910	1545	2105	1442	4425
6743	892	953	2544	3312	1962	2641	4264	1026	904	1539	2105	1429	4418
6738	892	953	2535	3312	1961	2590	4263	1022	898	1530	2105	1429	4415
6734	891	951	2528	3312	1958	2590	4258	1021	896	1506	2035	1415	4414
6731	891	946	2502	3305	1956	2586	4256	1021	894	1503	2035	1415	4412
6727	891	942	2497	3305	1956	2586	4256	1020	893	1499	2035	1412	4405
6726	891	942	2486	3305	1942	2549	4255	1016	884	1497	2035	1412	4393
6719	891	937	2454	3305	1939	2549	4252	1010	881	1496	2035	1392	4392
6711	890	935	2448	3305	1931	2525	4246	1009	879	1493	2035	1392	4352
6704	890	925	2439	3248	1924	2499	4232	1008	874	1482	2035	1387	4342
6702	890	920	2437	3248	1923	2488	4229	1008	874	1480	1994	1387	4342
6699	890	913	2428	3248	1891	2488	4228	1007	866	1479	1994	1376	4319
6686	890	913	2428	3248	1883	2474	4226	1004	856	1461	1994	1376	4305
6679	889	913	2418	3248	1880	2474	4205	1003	855	1447	1994	1375	4300
6679	888	908	2413	3205	1873	2452	4204	1002	850	1444	1994	1375	4282
6666	888	905	2391	3205	1863	2452	4204	1001	850	1439	1994	1371	4282
6657	888	904	2387	3205	1845	2434	4200	999	847	1437	1994	1371	4277
6648	888	902	2385	3205	1845	2434	4194	997	846	1428	1994	1369	4265
6644	883	898	2378	3205	1838	2413	4193	997	843	1428	1979	1369	4236
6639	883	896	2344	3093	1811	2362	4186	997	843	1423	1979	1363	4222
6637	882	887	2318	3093	1803	2358	4184	996	836	1413	1979	1363	4222
6631	882	886	2318	3093	1795	2358	4174	995	834	1402	1979	1356	4219
6624	882	871	2303	3093	1789	2340	4173	992	832	1394	1979	1356	4181
6621	882	867	2283	3093	1762	2320	4171	991	827	1393	1979	1352	4152
6604	880	863	2277	3077	1755	2320	4169	991	817	1385	1979	1352	4137
6599	876	852	2270	3077	1753	2289	4162	989	809	1370	1979	1336	4100
6583	876	851	2256	3077	1747	2289	4158	987	806	1365	1930	1336	4075
6580	876	849	2214	3077	1727	2261	4145	987	803	1362	1930	1335	4032
6579	876	846	2185	3077	1727	2261	4139	987	800	1358	1930	1335	4014
6576	874	838	2174	3034	1722	2261	4134	986	798	1343	1930	1334	4001
6575	872	830	2173	3034	1719	2261	4130	983	784	1343	1930	1334	3936
6569	869	822	2173	3034	1717	2241	4125	977	782	1342	1930	1333	3871
6567	869	821	2165	3034	1710	2216	4118	977	778	1338	1930	1333	3844
6567	868	815	2138	3034	1691	2216	4108	974	776	1338	1879	1314	3844
6563	868	813	2074	2945	1684	2191	4104	973	773	1337	1879	1314	3755
6541	867	812	2064	2945	1681	2191	4103	972	771	1333	1879	1308	3722
6538	867	811	2064	2945	1677	2181	4097	972	765	1328	1879	1308	3647
6536	867	806	2047	2945	1669	2170	4091	967	756	1327	1879	1305	3568
6528	866	804	2047	2940	1657	2170	4083	966	755	1313	1879	1305	3475
6527	866	787	2040	2940	1653	2166	4083	966	754	1313	1879	1278	3461
6526	866	777	2031	2940	1649	2166	4077	966	753	1306	1879	1278	3383
6520	865	763	2027	2940	1642	2164	4073	964	748	1303	1872	1265	3354
6518	865	762	2022	2940	1633	2164	4067	963	747	1297	1872	1265	3322
6509	864	760	2016	2915	1615	2108	4066	962	747	1290	1872	1261	3319
6496	860	754	2016	2915	1608	2038	4063	957	743	1276	1872	1261	3171
6495	859	751	1982	2915	1605	2017	4058	956	743	1261	1872	1243	3006
6492	859	744	1982	2915	1605	2017	4050	956	741	1261	1872	1243	2990
6491	859	743	1970	2915	1596	1982	4043	951	740	1260	1872	1234	2946
6483	859	738	1969	2836	1571	1982	4036	951	738	1255	1872	1234	2874
6483	859	734	1951	2836	1568	1941	4035	950	737	1254	1843	1219	2874
6475	859	724	1950	2836	1567	1941	4032	947	731	1231	1843	1219	2766
6471	859	723	1948	2836	1561	1918	4027	946	730	1215	1843	1213	2754
6465	858	716	1923	2836	1550	1918	4026	941	721	1215	1843	1213	2750
6461	858	714	1916	2759	1547	1909	4021	938	713	1178	1843	1210	2661
6459	858	713	1911	2759	1543	1909	4019	938	709	1175	1843	1210	2464
6457	857	713	1876	2759	1538	1860	4008	936	704	1172	1843	1193	2087
6448	857	697	1876	2759	1538	1807	3997	935	703	1153	1767	1193	2087
6447	856	697	1874	2759	1537	1807	3992	932	700	1149	1767	1188	2080
6442	856	692	1874	2536	1528	1792	3976	932	696	1145	1767	1188	1888
6439	855	691	1859	2536	1525	1759	3971	932	695	1145	1767	1182	1841
6435	855	689	1805	2536	1518	1759	3967	929	690	1142	1767	1182	1832
6434	855	685	1786	2536	1515	1747	3965	928	687	1120	1767	1172	1832
6424	855	684	1785	2536	1502	1747	3965	921	682	1109	1767	1172	1799
6423	855	683	1773	2390	1496	1714	3965	920	679	1105	1739	1160	1799
6414	854	673	1755	2390	1490	1714	3960	918	675	1095	1739	1160	1669
6411	854	673	1737	2390	1479	1653	3953	917	663	1095	1739	1159	1669
6409	854	669	1730	2390	1472	1646	3941	916	663	1086	1739	1159	1598
6386	854	662	1725	2390	1472	1646	3938	914	659	1083	1739	1157	1594
6383	852	657	1709	2336	1470	1509	3924	914	656	1055	1739	1157	1582
6377	852	657	1675	2336	1468	1509	3908	913	656	1053	1739	1153	1555
6374	849	653	1675	2336	1466	1485	3898	912	653	1047	1601	1153	1553
6360	849	649	1651	2336	1460	1485	3885	910	648	1042	1601	1143	1553
6352	849	645	1651	2336	1460	1473	3881	910	647	1026	1601	1143	1480
6327	849	634	1612	2308	1457	1462	3880	902	647	1005	1601	1122	1460
6319	847	631	1612	2308	1451	1462	3876	902	644	985	1601	1122	1444
6314	847	623	1566	2308	1448	1437	3876	901	628	973	1601	1115	1421
6307	846	615	1566	2308	1442	1434	3854	900	628	963	1601	1115	1400
6296	846	614	1556	2308	1435	1434	3853	898	628	962	1388	1110	1390
6286	845	613	1533	1898	1433	1389	3843	898	626	957	1388	1110	1390
6281	845	606	1527	1898	1418	1389	3842	897	625	946	1388	1110	1385
6259	845	606	1484	1898	1413	1373	3821	894	623	924	1388	1110	1312
6257	844	605	1392	1898	1397	1339	3810	893	622	923	1388	1108	1312
6252	844	596	1351	1898	1397	1339	3796	893	622	905	1388	1108	1266
6235	844	565	1339	1882	1396	1316	3781	891	621	903	1388	1097	1226
6225	842	563	1271	1882	1389	1192	3777	885	619	857	1388	1097	1220
6220	842	563	1265	1882	1385	1192	3767	883	616	853	1265	1096	1195
6201	841	554	1254	1882	1372	1066	3750	883	615	845	1265	1096	1169
6198	838	553	1176	1882	1369	1030	3744	883	607	829	1265	1083	1164
6190	838	552	1135	1683	1367	907	3741	882	602	814	1265	1083	1147
6181	837	549	1091	1683	1367	848	3739	882	597	810	1265	1078	1137
6175	837	545	1091	1683	1359	848	3732	878	595	804	1265	1078	1083
6165	837	544	1045	1683	1349	842	3729	877	591	801	1265	1067	1068
6156	837	544	1037	1683	1343	842	3726	877	587	798	1265	1067	1052
6152	837	541	970	1642	1336	807	3722	874	579	775	1197	1066	1052
6148	837	530	969	1642	1333	767	3688	873	578	740	1197	1066	1008
6128	833	529	963	1642	1333	708	3684	873	576	730	1197	1064	1001
6122	833	528	952	1642	1332	708	3683	871	575	720	1197	1064	990
6106	831	528	885	1592	1327	533	3682	871	570	720	1197	1060	990
6069	831	527	859	1592	1318	533	3676	869	551	709	1197	1060	988
6066	831	522	857	1592	1314	470	3651	869	549	704	1197	1058	971
6046	829	507	845	1592	1296	470	3631	866	548	692	1139	1058	945
6044	829	506	845	1592	1268	441	3608	862	545	679	1139	1054	927
6040	829	505	839	1404	1268	441	3606	859	544	625	1139	1054	901
6026	829	488	814	1404	1256	438	3600	859	541	609	1139	1040	897
5997	829	480	795	1404	1245	417	3594	858	540	582	1139	1040	897
5977	828	480	795	1404	1242	417	3568	857	537	505	1139	1025	864
5975	828	475	634	1387	1235	386	3562	853	534	243	1139	1025	773
5970	824	475	634	1387	1235	374	3559	849	529	178	1139	1012	769
5881	824	474	603	1387	1230	374	3488	849	529	176	1077	1012	735
5877	823	466	567	1387	1229	343	3479	844	527	166	1077	1005	627
5830	823	457	245	1330	1228	343	3314	844	518	151	1077	1005	615
5813	821	456	201	1330	1220	341	3303	841	513	149	1077	1001	592
5630	820	456	201	1330	1203	341	3273	839	490	127	1077	1001	533

## Sheet: RNA_genes_per_cell
CH-RNA HEK293T	Paired-seq HEK293T	sci-CAR HEK293T	SPLiT-seq HEK293T	sci-RNA-seq HEK293T	Drop-seq HEK293T	10X scRNA-seq HEK293T	CH-RNA NIH/3T3	Paired-seq NIH/3T3	sci-CAR NIH/3T3	SPLiT-seq NIH/3T3	sci-RNA-seq NIH/3T3	Drop-seq NIH/3T3	10x scRNA-seq NIH/3T3
5565	4230	5193	9205	3511	2602	5636	3755	2866	4302	5307	2647	2124	3422
5387	4230	4382	9145	3511	2602	5256	3718	2482	4024	4601	2647	2124	3275
5228	3507	4307	9051	3511	2301	5173	3172	2332	4017	4499	2647	2124	3275
4914	3507	4056	8738	3511	2301	5173	3128	2331	3996	4318	2647	1894	3240
4800	2086	4056	8641	3511	2287	5014	2945	2298	3971	4258	2647	1894	3231
4750	1884	3958	8242	3420	2287	4988	2847	2292	3958	4241	2647	1856	3230
4679	1884	3852	7836	3420	2276	4988	2730	2269	3911	4046	2647	1856	3092
4567	1851	3828	7440	3420	2276	4962	2728	2253	3841	3998	2594	1841	3092
4514	1851	3787	7005	3420	2200	4962	2637	2245	3740	3993	2594	1841	3086
4511	1839	3732	6814	3389	2200	4850	2603	2242	3629	3949	2594	1812	3086
4510	1839	3684	6693	3389	2192	4850	2583	2232	3613	3881	2594	1812	3020
4470	1819	3633	6585	3389	2192	4840	2576	2230	3550	3865	2594	1810	3007
4369	1767	3546	6517	3389	2184	4840	2548	2226	3519	3852	2594	1810	2969
4328	1767	3522	6502	3389	2184	4748	2452	2116	3510	3838	2594	1799	2960
4264	1704	3516	6452	3356	2180	4740	2446	2104	3419	3819	2594	1799	2959
4094	1704	3474	6354	3356	2180	4733	2417	2103	3405	3810	2387	1785	2954
4091	1668	3473	6229	3356	2158	4719	2414	2029	3403	3798	2387	1785	2954
4079	1638	3464	6220	3356	2158	4719	2414	2025	3389	3777	2387	1771	2940
4035	1638	3459	6186	3356	2142	4713	2413	2019	3290	3744	2387	1771	2857
4010	1635	3427	6121	3348	2142	4713	2368	1981	3275	3733	2387	1756	2766
4008	1635	3427	6072	3348	2140	4677	2355	1977	3275	3733	2387	1756	2735
3924	1578	3408	6063	3348	2140	4677	2339	1969	3254	3708	2387	1719	2701
3890	1578	3365	6058	3348	2139	4668	2338	1959	3234	3650	2336	1719	2695
3876	1573	3358	6058	3348	2139	4668	2336	1938	3218	3648	2336	1719	2695
3853	1561	3344	5988	3340	2133	4642	2327	1924	3194	3643	2336	1708	2689
3828	1561	3323	5936	3340	2133	4634	2323	1920	3187	3641	2336	1708	2689
3808	1557	3323	5936	3340	2117	4632	2318	1909	3183	3621	2336	1708	2687
3775	1557	3317	5919	3340	2117	4632	2310	1906	3162	3604	2336	1708	2685
3749	1528	3317	5919	3340	2114	4628	2307	1888	3135	3576	2336	1702	2685
3745	1528	3311	5898	3237	2114	4628	2305	1857	3133	3569	2336	1702	2671
3727	1504	3252	5880	3237	2079	4566	2300	1849	3119	3539	2322	1690	2671
3706	1504	3219	5867	3237	2079	4566	2298	1798	3108	3501	2322	1690	2646
3705	1494	3194	5771	3237	2076	4558	2292	1795	3105	3486	2322	1686	2646
3654	1494	3192	5739	3220	2076	4558	2292	1785	3096	3486	2322	1686	2642
3635	1462	3169	5709	3220	2074	4556	2248	1767	3091	3437	2322	1685	2634
3623	1462	3169	5702	3220	2074	4556	2246	1758	3091	3409	2322	1685	2624
3608	1461	3159	5684	3220	2061	4554	2223	1746	3080	3336	2322	1658	2624
3586	1461	3153	5672	3220	2061	4554	2216	1729	3049	3305	2322	1658	2616
3529	1419	3145	5628	3175	2022	4549	2215	1725	3033	3305	2271	1652	2613
3496	1419	3132	5616	3175	2022	4548	2213	1720	3024	3296	2271	1652	2611
3484	1419	3110	5608	3175	1997	4548	2199	1716	3010	3291	2271	1641	2611
3471	1419	3072	5489	3175	1997	4547	2197	1707	2967	3261	2271	1641	2607
3466	1405	3044	5482	3175	1991	4547	2195	1707	2962	3255	2271	1617	2607
3458	1405	3035	5480	3124	1991	4542	2190	1698	2949	3239	2271	1617	2599
3392	1381	3027	5479	3124	1983	4542	2179	1690	2935	3237	2271	1616	2591
3380	1377	3027	5479	3124	1983	4512	2179	1674	2923	3227	2178	1616	2568
3372	1377	3025	5464	3124	1979	4512	2178	1668	2922	3220	2178	1614	2539
3369	1372	3002	5460	3124	1979	4507	2170	1659	2914	3189	2178	1614	2537
3363	1372	2995	5421	3123	1972	4502	2167	1651	2901	3182	2178	1610	2537
3342	1357	2993	5408	3123	1972	4502	2165	1642	2896	3162	2178	1610	2531
3329	1357	2993	5382	3123	1962	4502	2153	1642	2889	3137	2178	1601	2523
3324	1350	2993	5377	3123	1962	4502	2150	1636	2873	3136	2178	1601	2514
3318	1350	2981	5375	3123	1961	4493	2150	1632	2849	3124	2178	1593	2509
3307	1341	2979	5368	3098	1961	4493	2146	1623	2841	3118	2153	1593	2508
3298	1339	2976	5279	3098	1951	4492	2139	1617	2838	3108	2153	1558	2506
3281	1339	2945	5277	3098	1951	4492	2138	1615	2826	3108	2153	1558	2505
3277	1327	2941	5258	3098	1947	4491	2128	1614	2804	3104	2153	1549	2492
3218	1327	2937	5193	3098	1947	4491	2124	1611	2796	3104	2153	1549	2488
3193	1314	2933	5179	3043	1924	4487	2119	1611	2791	3089	2153	1543	2479
3158	1314	2914	5166	3043	1924	4487	2117	1600	2789	3089	2153	1543	2479
3156	1297	2894	5166	3043	1917	4483	2116	1588	2778	3085	2149	1532	2475
3154	1297	2871	5138	3043	1917	4481	2091	1582	2754	3077	2149	1532	2471
3101	1294	2871	5135	2980	1917	4481	2082	1581	2746	3077	2149	1532	2461
3091	1294	2858	5130	2980	1917	4469	2081	1581	2741	3048	2149	1523	2459
3080	1288	2853	5112	2980	1910	4469	2069	1579	2729	3044	2149	1523	2449
3079	1288	2832	5111	2980	1910	4466	2066	1573	2719	3043	2149	1521	2446
3055	1288	2830	5072	2980	1898	4466	2061	1572	2716	3037	2149	1521	2438
3047	1288	2827	5040	2977	1898	4463	2060	1570	2700	3028	2142	1512	2438
3038	1282	2816	5040	2977	1893	4462	2051	1570	2697	3016	2142	1512	2438
3015	1278	2782	5035	2977	1893	4462	2049	1570	2692	3016	2142	1510	2437
3003	1267	2778	5035	2977	1876	4457	2042	1561	2682	3000	2142	1510	2431
3000	1267	2777	5027	2948	1876	4457	2028	1551	2659	3000	2142	1496	2431
2999	1257	2777	5012	2948	1874	4454	2024	1545	2643	2999	2142	1496	2431
2994	1257	2772	5000	2948	1874	4454	2023	1543	2641	2997	2142	1493	2431
2980	1242	2771	4997	2948	1871	4453	2011	1540	2630	2993	2142	1493	2431
2976	1236	2751	4960	2948	1871	4453	2011	1536	2628	2983	2105	1493	2429
2975	1236	2736	4933	2941	1869	4450	2008	1536	2624	2981	2105	1493	2422
2972	1206	2736	4920	2941	1869	4450	2003	1534	2594	2976	2105	1493	2417
2961	1206	2717	4918	2941	1867	4444	2003	1533	2578	2976	2105	1482	2412
2957	1206	2716	4910	2941	1867	4444	2002	1528	2566	2958	2105	1482	2406
2947	1198	2708	4910	2941	1857	4443	2000	1522	2561	2957	2105	1477	2405
2945	1188	2702	4906	2939	1857	4443	1990	1522	2554	2939	2105	1477	2405
2938	1188	2698	4892	2939	1830	4437	1989	1519	2547	2926	2089	1473	2404
2938	1176	2698	4880	2939	1830	4437	1980	1518	2542	2926	2089	1473	2404
2936	1176	2693	4880	2939	1821	4434	1976	1516	2539	2922	2089	1458	2402
2928	1174	2688	4869	2939	1821	4434	1964	1515	2522	2905	2089	1458	2401
2923	1174	2688	4858	2806	1819	4419	1960	1509	2509	2902	2089	1457	2395
2914	1173	2679	4810	2806	1819	4419	1959	1509	2509	2899	2089	1457	2394
2898	1170	2676	4797	2806	1803	4415	1959	1507	2508	2894	2089	1450	2392
2897	1158	2664	4770	2806	1803	4406	1952	1506	2495	2889	2089	1450	2388
2894	1153	2652	4770	2804	1800	4398	1951	1504	2489	2880	2078	1448	2380
2883	1153	2646	4768	2804	1800	4370	1947	1504	2478	2880	2078	1448	2378
2871	1149	2646	4740	2804	1791	4370	1942	1504	2477	2880	2078	1448	2378
2868	1147	2645	4733	2804	1791	4366	1936	1498	2458	2866	2078	1448	2378
2857	1147	2644	4732	2804	1786	4360	1933	1495	2450	2857	2078	1444	2369
2855	1120	2642	4721	2801	1786	4360	1932	1491	2450	2855	2078	1444	2369
2833	1116	2635	4721	2801	1785	4354	1923	1482	2441	2854	2078	1443	2366
2833	1116	2629	4719	2801	1785	4354	1921	1480	2429	2827	2078	1443	2365
2830	1114	2615	4711	2801	1781	4353	1921	1479	2427	2826	2071	1439	2361
2829	1114	2605	4679	2801	1781	4353	1920	1474	2418	2820	2071	1439	2361
2824	1108	2605	4679	2796	1778	4347	1919	1474	2400	2820	2071	1439	2359
2823	1102	2598	4670	2796	1778	4347	1915	1470	2397	2819	2071	1439	2358
2813	1102	2593	4670	2796	1772	4341	1915	1467	2386	2819	2071	1426	2356
2811	1095	2592	4655	2796	1772	4341	1914	1455	2381	2817	2071	1426	2351
2810	1095	2583	4644	2796	1756	4340	1909	1453	2378	2815	2071	1416	2351
2810	1092	2576	4644	2795	1756	4340	1900	1447	2374	2785	2071	1416	2348
2809	1090	2539	4639	2795	1744	4340	1890	1447	2368	2783	2062	1402	2344
2799	1090	2516	4636	2795	1744	4340	1885	1446	2366	2778	2062	1402	2343
2794	1090	2512	4624	2795	1736	4339	1880	1446	2351	2770	2062	1398	2343
2791	1090	2509	4624	2795	1736	4339	1873	1443	2335	2769	2062	1398	2342
2780	1090	2509	4608	2793	1726	4337	1871	1443	2334	2768	2062	1388	2342
2771	1090	2504	4599	2793	1726	4327	1866	1443	2323	2740	2062	1388	2341
2771	1087	2501	4595	2793	1717	4327	1865	1441	2277	2732	2062	1383	2341
2758	1087	2497	4579	2793	1717	4326	1856	1437	2276	2732	2057	1383	2330
2756	1087	2495	4579	2793	1716	4325	1848	1434	2275	2728	2057	1382	2326
2749	1087	2493	4566	2787	1716	4325	1841	1431	2267	2723	2057	1382	2325
2744	1086	2491	4566	2787	1709	4324	1840	1429	2267	2722	2057	1380	2323
2744	1086	2482	4553	2787	1709	4324	1832	1428	2265	2718	2057	1380	2321
2738	1081	2478	4551	2787	1707	4316	1831	1428	2262	2717	2057	1377	2320
2735	1074	2473	4543	2787	1707	4312	1829	1420	2261	2713	2057	1377	2317
2733	1074	2466	4536	2772	1701	4310	1828	1414	2258	2711	2047	1375	2316
2730	1071	2465	4530	2772	1701	4310	1827	1411	2256	2702	2047	1375	2314
2728	1071	2459	4513	2772	1699	4305	1824	1411	2254	2699	2047	1374	2312
2726	1066	2443	4509	2772	1699	4305	1823	1411	2249	2699	2047	1374	2312
2725	1066	2442	4506	2772	1697	4302	1809	1410	2246	2698	2047	1371	2312
2715	1065	2437	4500	2759	1697	4302	1806	1407	2245	2692	2047	1371	2310
2713	1065	2436	4478	2759	1687	4296	1806	1404	2244	2692	2047	1365	2308
2700	1063	2433	4466	2759	1687	4296	1806	1399	2242	2689	2045	1365	2307
2699	1060	2419	4445	2759	1687	4296	1805	1392	2241	2678	2045	1364	2306
2698	1056	2418	4445	2759	1687	4296	1799	1392	2233	2676	2045	1364	2302
2698	1054	2416	4437	2712	1686	4290	1791	1378	2225	2666	2045	1360	2299
2696	1045	2411	4437	2712	1686	4284	1788	1377	2223	2661	2045	1360	2298
2695	1045	2410	4432	2712	1683	4284	1787	1375	2223	2660	2045	1359	2298
2693	1038	2405	4432	2712	1683	4279	1784	1372	2216	2651	2045	1359	2298
2689	1038	2404	4430	2705	1683	4267	1783	1372	2215	2639	2045	1356	2297
2682	1035	2403	4416	2705	1683	4267	1782	1366	2213	2639	2043	1356	2297
2680	1035	2402	4411	2705	1672	4260	1776	1363	2209	2637	2043	1353	2293
2663	1035	2402	4411	2705	1672	4260	1773	1363	2209	2637	2043	1353	2293
2661	1035	2402	4409	2705	1662	4244	1771	1359	2205	2634	2043	1349	2291
2649	1027	2400	4409	2701	1662	4244	1770	1359	2202	2632	2043	1349	2290
2646	1027	2380	4406	2701	1657	4244	1766	1354	2194	2628	2043	1348	2290
2646	1021	2378	4406	2701	1657	4244	1762	1351	2187	2623	2043	1348	2288
2643	996	2372	4406	2701	1654	4240	1760	1350	2179	2616	2043	1347	2287
2643	996	2370	4382	2701	1654	4239	1754	1345	2177	2612	2027	1347	2283
2638	993	2368	4380	2693	1646	4239	1753	1339	2170	2606	2027	1345	2279
2624	993	2363	4361	2693	1646	4234	1748	1338	2169	2603	2027	1345	2277
2623	993	2357	4361	2693	1639	4234	1748	1338	2166	2597	2027	1342	2277
2622	990	2355	4360	2693	1639	4233	1746	1333	2155	2597	2027	1342	2277
2621	990	2351	4357	2693	1639	4233	1745	1332	2153	2590	2027	1339	2277
2620	990	2351	4357	2691	1639	4232	1742	1324	2150	2584	2027	1339	2276
2618	988	2347	4302	2691	1639	4232	1740	1318	2148	2581	2008	1336	2276
2617	988	2346	4297	2691	1639	4211	1735	1317	2120	2574	2008	1336	2274
2612	985	2346	4273	2691	1634	4206	1732	1315	2115	2564	2008	1336	2274
2606	985	2345	4273	2691	1634	4206	1731	1315	2113	2563	2008	1336	2274
2605	981	2341	4264	2684	1633	4203	1730	1309	2112	2562	2008	1335	2272
2603	981	2334	4249	2684	1633	4201	1728	1300	2108	2555	2008	1335	2272
2602	973	2331	4240	2684	1628	4201	1726	1296	2106	2552	2008	1335	2271
2590	967	2323	4236	2684	1628	4199	1723	1291	2099	2550	2008	1335	2270
2590	966	2319	4235	2684	1628	4199	1721	1291	2096	2549	2006	1333	2268
2585	964	2315	4233	2681	1628	4197	1720	1291	2091	2547	2006	1333	2267
2582	964	2315	4232	2681	1624	4197	1719	1288	2090	2544	2006	1332	2266
2582	960	2309	4224	2681	1624	4195	1719	1281	2086	2534	2006	1332	2266
2574	957	2295	4221	2681	1618	4195	1717	1279	2085	2532	2006	1331	2266
2567	957	2294	4202	2681	1618	4188	1716	1278	2081	2528	2006	1331	2259
2560	955	2290	4201	2673	1617	4188	1715	1276	2070	2523	2006	1329	2259
2559	955	2283	4197	2673	1617	4184	1714	1270	2065	2502	2006	1329	2258
2551	951	2283	4197	2673	1615	4184	1708	1269	2054	2499	2003	1324	2257
2550	951	2281	4197	2673	1615	4183	1705	1254	2051	2495	2003	1324	2257
2548	951	2280	4189	2673	1615	4183	1704	1248	2043	2495	2003	1323	2257
2547	951	2278	4188	2662	1615	4182	1702	1245	2040	2493	2003	1323	2254
2546	949	2276	4183	2662	1612	4182	1698	1243	2037	2486	2003	1323	2254
2541	949	2269	4181	2662	1612	4181	1697	1240	2029	2486	2003	1323	2254
2541	949	2268	4181	2662	1611	4179	1695	1240	2028	2479	2003	1321	2253
2540	949	2268	4176	2662	1611	4179	1694	1240	2018	2477	2003	1321	2252
2539	949	2267	4171	2657	1610	4179	1691	1239	2008	2477	2001	1310	2249
2519	949	2264	4163	2657	1610	4173	1689	1239	2008	2472	2001	1310	2247
2510	945	2259	4160	2657	1610	4173	1682	1239	2005	2472	2001	1309	2247
2504	940	2259	4152	2657	1610	4160	1681	1234	2004	2471	2001	1309	2245
2503	939	2249	4132	2657	1601	4148	1680	1231	2003	2469	2001	1306	2245
2500	939	2249	4132	2657	1601	4148	1677	1231	1994	2465	2001	1306	2241
2500	936	2246	4107	2657	1600	4148	1675	1231	1987	2465	2001	1305	2241
2486	936	2242	4097	2657	1600	4143	1672	1225	1984	2458	1997	1305	2240
2481	933	2241	4071	2657	1599	4138	1668	1224	1978	2456	1997	1304	2239
2472	933	2235	4065	2656	1599	4138	1665	1224	1973	2454	1997	1304	2239
2468	919	2225	4059	2656	1598	4136	1664	1224	1970	2444	1997	1299	2238
2465	919	2213	4057	2656	1598	4136	1662	1224	1969	2444	1997	1299	2236
2460	919	2213	4052	2656	1597	4128	1660	1215	1968	2442	1997	1297	2236
2453	916	2211	4049	2654	1597	4128	1657	1215	1968	2442	1997	1297	2234
2452	916	2208	4049	2654	1595	4126	1650	1215	1966	2430	1997	1293	2231
2449	910	2207	4040	2654	1595	4126	1646	1215	1963	2428	1993	1293	2231
2442	907	2201	4029	2654	1593	4120	1645	1213	1962	2424	1993	1293	2230
2437	901	2198	4023	2654	1593	4120	1641	1212	1961	2423	1993	1293	2227
2434	901	2193	4007	2652	1582	4116	1636	1206	1958	2413	1993	1291	2227
2431	895	2193	3992	2652	1582	4116	1635	1206	1954	2410	1993	1291	2227
2429	895	2193	3984	2652	1581	4114	1635	1204	1953	2408	1993	1290	2226
2428	895	2186	3979	2652	1581	4114	1632	1203	1951	2407	1993	1290	2225
2427	888	2183	3979	2652	1581	4110	1630	1203	1937	2405	1976	1288	2224
2421	886	2172	3972	2647	1581	4110	1629	1200	1937	2403	1976	1288	2223
2419	885	2172	3964	2647	1576	4106	1627	1200	1926	2398	1976	1287	2223
2413	885	2169	3964	2647	1576	4105	1623	1198	1925	2398	1976	1287	2222
2411	883	2169	3960	2647	1572	4105	1621	1194	1923	2396	1976	1281	2222
2411	883	2163	3952	2647	1572	4097	1614	1192	1923	2394	1976	1281	2222
2411	882	2159	3952	2643	1568	4096	1613	1191	1919	2391	1976	1274	2221
2410	879	2158	3950	2643	1568	4096	1609	1183	1913	2389	1976	1274	2219
2404	873	2152	3950	2643	1562	4086	1608	1183	1909	2389	1975	1273	2219
2403	870	2149	3950	2643	1562	4082	1608	1176	1902	2380	1975	1273	2218
2402	870	2143	3944	2637	1561	4082	1606	1173	1892	2374	1975	1273	2217
2400	870	2140	3944	2637	1561	4072	1605	1173	1892	2373	1975	1273	2216
2397	870	2129	3944	2637	1558	4072	1604	1173	1886	2366	1975	1273	2215
2397	864	2125	3942	2637	1558	4071	1603	1171	1881	2363	1975	1273	2215
2394	858	2119	3939	2637	1558	4071	1599	1168	1873	2357	1975	1271	2214
2392	856	2115	3934	2632	1558	4071	1598	1167	1861	2353	1972	1271	2214
2392	852	2111	3930	2632	1557	4067	1598	1165	1858	2352	1972	1268	2211
2392	852	2110	3930	2632	1557	4066	1597	1165	1849	2352	1972	1268	2211
2391	850	2105	3925	2632	1554	4066	1595	1162	1847	2347	1972	1268	2211
2389	850	2103	3923	2632	1554	4061	1595	1161	1846	2345	1972	1268	2211
2388	847	2103	3915	2630	1552	4061	1593	1158	1842	2345	1972	1266	2208
2388	847	2100	3906	2630	1552	4061	1592	1152	1841	2342	1972	1266	2208
2380	841	2093	3896	2630	1547	4061	1592	1152	1840	2342	1971	1266	2208
2378	841	2092	3893	2630	1547	4061	1591	1152	1838	2336	1971	1266	2208
2378	840	2091	3889	2630	1543	4058	1590	1146	1835	2334	1971	1265	2207
2368	838	2089	3889	2621	1543	4056	1585	1141	1833	2332	1971	1265	2206
2366	838	2086	3887	2621	1542	4054	1585	1138	1832	2329	1971	1264	2202
2361	838	2080	3877	2621	1542	4054	1585	1138	1829	2320	1971	1264	2201
2358	838	2073	3876	2621	1542	4050	1583	1137	1829	2317	1971	1261	2201
2354	837	2072	3849	2621	1542	4050	1583	1137	1826	2317	1961	1261	2200
2354	837	2070	3839	2615	1539	4046	1576	1135	1826	2312	1961	1256	2199
2348	837	2070	3839	2615	1539	4046	1575	1132	1821	2310	1961	1256	2199
2348	832	2070	3835	2615	1538	4036	1574	1131	1818	2308	1961	1251	2197
2348	832	2054	3826	2615	1538	4036	1572	1125	1818	2303	1961	1251	2194
2347	832	2052	3826	2566	1538	4034	1572	1122	1811	2301	1961	1248	2194
2346	832	2049	3820	2566	1538	4023	1568	1119	1811	2299	1961	1248	2193
2341	832	2040	3820	2566	1536	4023	1562	1119	1802	2299	1908	1241	2193
2341	832	2034	3816	2566	1536	4018	1558	1117	1802	2299	1908	1241	2192
2340	832	2034	3814	2566	1529	4016	1557	1116	1788	2293	1908	1239	2192
2338	829	2032	3813	2565	1529	4016	1553	1116	1782	2292	1908	1239	2191
2333	829	2032	3798	2565	1527	4015	1548	1116	1777	2292	1908	1237	2191
2326	829	2031	3797	2565	1527	4015	1542	1114	1776	2288	1908	1237	2190
2323	829	2022	3781	2565	1525	4012	1538	1102	1775	2288	1908	1237	2189
2323	829	2021	3780	2564	1525	4012	1537	1101	1772	2285	1905	1237	2189
2314	826	2016	3766	2564	1524	4010	1537	1099	1768	2278	1905	1235	2187
2313	826	2014	3766	2564	1524	4010	1533	1093	1767	2275	1905	1235	2186
2310	826	2011	3761	2564	1516	4004	1530	1087	1766	2271	1905	1234	2186
2308	826	2009	3759	2559	1516	3997	1528	1086	1756	2269	1905	1234	2185
2307	822	2008	3756	2559	1515	3997	1528	1086	1752	2267	1905	1233	2177
2307	820	2003	3730	2559	1515	3992	1528	1080	1748	2265	1905	1233	2176
2305	820	1999	3730	2559	1514	3992	1526	1080	1746	2260	1895	1231	2175
2305	814	1993	3730	2559	1514	3992	1524	1078	1738	2260	1895	1231	2175
2303	805	1990	3722	2555	1513	3986	1520	1077	1737	2259	1895	1229	2175
2302	805	1985	3717	2555	1513	3985	1518	1074	1737	2259	1895	1229	2174
2302	804	1984	3715	2555	1512	3985	1516	1066	1736	2256	1895	1225	2174
2300	804	1980	3712	2555	1512	3985	1516	1057	1734	2256	1895	1225	2173
2299	802	1963	3709	2552	1511	3980	1515	1054	1732	2255	1895	1225	2173
2296	796	1959	3705	2552	1511	3968	1515	1054	1730	2255	1893	1225	2173
2291	796	1959	3702	2552	1509	3968	1514	1053	1728	2253	1893	1224	2172
2289	793	1958	3690	2552	1509	3965	1514	1053	1727	2250	1893	1224	2172
2288	793	1949	3687	2552	1507	3965	1514	1053	1726	2248	1893	1223	2170
2287	792	1949	3686	2551	1507	3962	1513	1050	1716	2248	1893	1223	2168
2287	792	1942	3682	2551	1499	3962	1512	1048	1714	2246	1893	1222	2167
2283	790	1938	3658	2551	1499	3961	1512	1048	1712	2246	1893	1222	2165
2283	790	1936	3654	2551	1486	3957	1512	1047	1712	2241	1881	1221	2165
2283	789	1936	3638	2551	1486	3957	1511	1044	1709	2241	1881	1221	2165
2283	789	1934	3632	2550	1485	3951	1510	1044	1707	2241	1881	1220	2165
2281	787	1934	3630	2550	1485	3951	1509	1044	1701	2238	1881	1220	2164
2281	787	1933	3629	2550	1484	3947	1507	1041	1696	2236	1881	1220	2164
2276	784	1930	3629	2550	1484	3947	1504	1041	1694	2236	1881	1220	2164
2276	784	1930	3629	2550	1483	3944	1500	1039	1693	2233	1881	1220	2162
2273	784	1926	3624	2549	1483	3944	1500	1036	1693	2233	1881	1220	2162
2271	784	1926	3620	2549	1482	3943	1500	1033	1686	2226	1874	1218	2162
2271	784	1923	3610	2549	1482	3940	1499	1032	1675	2216	1874	1218	2161
2267	784	1919	3602	2549	1482	3940	1498	1030	1675	2216	1874	1217	2161
2261	784	1918	3583	2541	1482	3938	1497	1029	1673	2209	1874	1217	2161
2259	784	1918	3578	2541	1478	3938	1497	1024	1672	2204	1874	1216	2160
2254	784	1916	3578	2541	1478	3931	1496	1021	1672	2199	1874	1216	2160
2253	781	1914	3577	2541	1478	3931	1494	1017	1659	2199	1874	1215	2159
2248	781	1913	3572	2541	1478	3928	1494	1017	1658	2197	1870	1215	2159
2245	769	1912	3570	2537	1478	3928	1493	1017	1655	2192	1870	1209	2158
2245	769	1912	3570	2537	1478	3927	1489	1014	1654	2190	1870	1209	2157
2241	768	1905	3570	2537	1477	3920	1486	1014	1649	2187	1870	1208	2156
2240	768	1902	3569	2537	1477	3920	1485	1011	1645	2187	1870	1208	2156
2238	768	1897	3568	2537	1474	3917	1484	1011	1644	2181	1870	1206	2154
2237	763	1894	3560	2535	1474	3917	1484	1009	1643	2178	1870	1206	2153
2237	763	1890	3553	2535	1473	3916	1484	1008	1641	2178	1846	1201	2152
2234	762	1889	3551	2535	1473	3916	1481	1006	1639	2177	1846	1201	2152
2232	762	1889	3541	2535	1471	3915	1479	1002	1635	2174	1846	1200	2151
2232	760	1886	3541	2535	1471	3915	1478	1002	1634	2168	1846	1200	2151
2225	760	1886	3538	2531	1470	3911	1476	1002	1632	2164	1846	1198	2149
2223	759	1885	3538	2531	1470	3911	1476	1000	1629	2160	1846	1198	2148
2222	756	1885	3528	2531	1467	3900	1476	1000	1629	2160	1846	1195	2148
2220	756	1878	3522	2531	1467	3899	1472	996	1626	2158	1840	1195	2147
2219	754	1875	3514	2531	1465	3899	1470	994	1620	2158	1840	1195	2146
2213	754	1874	3514	2531	1465	3896	1470	993	1619	2156	1840	1195	2144
2210	754	1873	3512	2531	1462	3886	1470	990	1618	2156	1840	1192	2142
2210	754	1871	3507	2531	1462	3886	1470	990	1618	2153	1840	1192	2141
2208	753	1861	3507	2531	1462	3883	1469	990	1617	2148	1840	1186	2141
2203	753	1860	3496	2529	1462	3883	1468	990	1597	2146	1840	1186	2141
2201	753	1860	3492	2529	1458	3873	1467	988	1595	2143	1840	1185	2141
2196	751	1853	3492	2529	1458	3873	1467	987	1587	2141	1837	1185	2141
2192	751	1848	3487	2529	1457	3873	1466	985	1586	2140	1837	1182	2140
2192	750	1848	3486	2529	1457	3873	1464	985	1585	2137	1837	1182	2140
2192	748	1846	3481	2523	1457	3872	1462	985	1580	2137	1837	1178	2140
2191	748	1845	3481	2523	1457	3872	1462	982	1578	2135	1837	1178	2140
2191	748	1844	3481	2523	1450	3870	1460	979	1578	2135	1837	1177	2139
2191	748	1844	3476	2523	1450	3870	1458	978	1572	2135	1837	1177	2138
2190	747	1843	3465	2523	1450	3865	1456	976	1571	2132	1837	1175	2138
2187	747	1841	3462	2517	1450	3865	1455	976	1571	2129	1821	1175	2138
2186	742	1841	3462	2517	1447	3863	1454	975	1568	2128	1821	1169	2138
2186	741	1834	3447	2517	1447	3855	1453	972	1567	2128	1821	1169	2138
2185	741	1834	3442	2517	1444	3855	1453	969	1564	2125	1821	1167	2138
2185	732	1823	3434	2517	1444	3855	1451	969	1549	2120	1821	1167	2138
2183	727	1816	3428	2516	1442	3848	1450	964	1548	2106	1821	1162	2138
2182	727	1813	3424	2516	1442	3846	1449	963	1548	2106	1821	1162	2137
2181	721	1811	3424	2516	1440	3846	1447	958	1546	2104	1817	1156	2137
2180	720	1800	3420	2516	1440	3844	1445	958	1546	2101	1817	1156	2136
2179	720	1791	3420	2516	1438	3839	1445	955	1544	2100	1817	1152	2136
2177	718	1788	3417	2516	1438	3839	1444	955	1543	2098	1817	1152	2136
2175	717	1782	3417	2516	1434	3837	1444	952	1534	2098	1817	1150	2135
2174	715	1779	3411	2516	1434	3837	1443	951	1533	2098	1817	1150	2134
2172	715	1779	3407	2516	1430	3837	1443	951	1531	2097	1817	1149	2133
2172	714	1772	3406	2516	1430	3837	1442	951	1531	2096	1802	1149	2133
2170	711	1771	3405	2515	1426	3834	1442	951	1523	2095	1802	1149	2133
2168	709	1766	3405	2515	1426	3834	1440	945	1522	2095	1802	1149	2133
2163	709	1761	3405	2515	1426	3834	1439	942	1522	2091	1802	1148	2132
2161	709	1758	3404	2515	1426	3833	1437	942	1518	2087	1802	1148	2132
2161	708	1750	3400	2515	1425	3833	1436	940	1511	2083	1802	1148	2132
2160	708	1750	3396	2515	1425	3829	1433	940	1509	2080	1802	1148	2131
2159	708	1746	3396	2515	1423	3829	1432	940	1502	2076	1802	1146	2131
2158	705	1745	3391	2515	1423	3824	1427	939	1498	2076	1794	1146	2130
2157	702	1745	3376	2515	1421	3824	1426	937	1495	2073	1794	1145	2128
2154	702	1742	3375	2515	1421	3817	1425	937	1494	2069	1794	1145	2127
2154	700	1735	3371	2510	1415	3809	1424	936	1490	2067	1794	1145	2127
2150	700	1735	3371	2510	1415	3809	1419	936	1489	2066	1794	1145	2127
2149	699	1734	3361	2510	1413	3807	1419	936	1483	2065	1794	1143	2126
2149	696	1726	3357	2510	1413	3806	1414	936	1478	2062	1794	1143	2126
2145	696	1721	3357	2510	1410	3806	1414	936	1476	2058	1794	1142	2125
2144	696	1719	3355	2502	1410	3806	1412	933	1474	2053	1789	1142	2125
2143	691	1719	3354	2502	1410	3806	1411	930	1473	2047	1789	1141	2123
2142	688	1712	3349	2502	1410	3804	1410	930	1469	2046	1789	1141	2123
2142	688	1712	3349	2502	1409	3804	1408	928	1467	2044	1789	1140	2122
2141	688	1712	3343	2502	1409	3804	1406	927	1467	2041	1789	1140	2120
2140	687	1707	3329	2500	1405	3804	1405	925	1465	2040	1789	1137	2120
2139	687	1706	3329	2500	1405	3802	1400	924	1465	2039	1789	1137	2118
2137	685	1702	3318	2500	1403	3802	1400	921	1462	2033	1777	1134	2117
2136	685	1702	3310	2500	1403	3799	1399	919	1459	2032	1777	1134	2116
2133	684	1702	3309	2500	1394	3799	1398	919	1458	2029	1777	1132	2116
2132	684	1701	3309	2489	1394	3795	1398	918	1455	2029	1777	1132	2115
2132	684	1701	3299	2489	1392	3794	1397	918	1454	2028	1777	1130	2115
2131	684	1698	3299	2489	1392	3791	1393	912	1452	2027	1777	1130	2112
2131	682	1698	3291	2489	1389	3791	1392	910	1451	2025	1777	1130	2112
2126	682	1696	3290	2489	1389	3783	1391	910	1449	2025	1777	1130	2110
2123	678	1693	3290	2489	1387	3783	1390	907	1444	2019	1767	1130	2109
2121	673	1692	3288	2489	1387	3773	1390	903	1444	2015	1767	1130	2109
2119	673	1687	3274	2489	1387	3765	1388	901	1444	2012	1767	1128	2109
2119	669	1686	3272	2489	1387	3765	1386	900	1440	2012	1767	1128	2108
2118	667	1682	3270	2483	1386	3765	1386	900	1420	2009	1767	1123	2107
2116	667	1681	3257	2483	1386	3761	1385	900	1409	2003	1767	1123	2106
2114	666	1679	3249	2483	1385	3760	1384	900	1408	2003	1767	1121	2106
2112	666	1675	3249	2483	1385	3760	1383	898	1405	2003	1766	1121	2106
2110	666	1674	3245	2477	1385	3753	1382	897	1400	2001	1766	1119	2106
2110	666	1674	3238	2477	1385	3753	1382	897	1397	2000	1766	1119	2105
2106	661	1672	3238	2477	1384	3753	1381	889	1394	1995	1766	1116	2104
2104	661	1672	3237	2477	1384	3750	1376	888	1392	1982	1766	1116	2099
2103	658	1665	3235	2473	1382	3750	1374	888	1385	1974	1766	1113	2099
2101	658	1665	3231	2473	1382	3747	1373	885	1384	1973	1766	1113	2097
2100	658	1664	3223	2473	1380	3747	1372	885	1382	1966	1766	1111	2096
2097	658	1664	3221	2473	1380	3744	1370	882	1382	1965	1760	1111	2095
2096	655	1664	3221	2473	1379	3743	1370	882	1381	1965	1760	1110	2095
2094	655	1660	3218	2458	1379	3742	1370	879	1380	1964	1760	1110	2095
2092	654	1659	3217	2458	1379	3742	1368	879	1380	1963	1760	1108	2093
2088	652	1659	3213	2458	1379	3737	1367	876	1375	1961	1760	1108	2092
2088	652	1659	3202	2458	1371	3737	1365	871	1370	1961	1760	1108	2092
2085	651	1658	3193	2454	1371	3733	1365	864	1368	1956	1760	1108	2092
2080	651	1651	3193	2454	1370	3733	1365	864	1367	1956	1759	1108	2092
2080	649	1648	3190	2454	1370	3730	1365	864	1362	1953	1759	1108	2091
2077	649	1648	3190	2454	1367	3730	1365	864	1355	1948	1759	1096	2090
2077	648	1646	3187	2454	1367	3730	1364	862	1354	1946	1759	1096	2087
2075	645	1641	3186	2452	1366	3729	1363	862	1354	1945	1759	1096	2086
2073	645	1638	3180	2452	1366	3729	1361	862	1353	1944	1759	1096	2086
2073	645	1634	3178	2452	1365	3724	1361	861	1352	1943	1759	1095	2084
2070	643	1630	3169	2452	1365	3724	1360	861	1348	1943	1759	1095	2084
2066	643	1630	3167	2452	1364	3723	1358	858	1346	1941	1757	1095	2084
2063	642	1628	3164	2438	1364	3720	1357	858	1345	1940	1757	1095	2084
2063	642	1626	3163	2438	1364	3720	1357	858	1344	1939	1757	1092	2083
2061	640	1625	3160	2438	1364	3716	1355	852	1342	1931	1757	1092	2083
2060	640	1624	3159	2438	1361	3716	1355	852	1338	1930	1757	1087	2081
2058	639	1624	3158	2430	1361	3711	1354	852	1338	1925	1757	1087	2081
2057	639	1624	3158	2430	1360	3711	1354	852	1334	1925	1757	1084	2080
2057	639	1620	3153	2430	1360	3700	1353	849	1330	1919	1757	1084	2080
2053	631	1617	3149	2430	1355	3700	1352	847	1329	1919	1747	1082	2078
2052	628	1616	3149	2413	1355	3696	1349	847	1329	1919	1747	1082	2077
2048	628	1616	3147	2413	1354	3696	1349	847	1327	1914	1747	1081	2076
2046	627	1611	3135	2413	1354	3692	1348	846	1326	1914	1747	1081	2076
2046	625	1608	3134	2413	1351	3692	1346	846	1325	1913	1747	1077	2075
2046	625	1608	3116	2413	1351	3688	1346	844	1324	1907	1747	1077	2074
2044	625	1606	3112	2405	1350	3688	1343	843	1323	1905	1747	1070	2074
2043	622	1602	3087	2405	1350	3687	1342	843	1314	1904	1747	1070	2074
2042	622	1601	3087	2405	1350	3680	1341	835	1311	1903	1740	1068	2072
2041	622	1600	3086	2405	1350	3680	1340	835	1310	1901	1740	1068	2071
2039	622	1591	3084	2405	1350	3680	1335	834	1307	1901	1740	1067	2068
2037	619	1590	3083	2404	1350	3680	1334	834	1307	1901	1740	1067	2068
2033	619	1590	3083	2404	1346	3677	1334	832	1298	1900	1740	1065	2068
2031	613	1584	3080	2404	1346	3677	1334	829	1296	1900	1740	1065	2067
2029	612	1583	3075	2404	1345	3675	1333	828	1290	1898	1740	1063	2067
2029	612	1581	3075	2404	1345	3675	1332	826	1290	1898	1734	1063	2066
2025	612	1580	3066	2400	1344	3668	1332	825	1289	1898	1734	1062	2066
2023	612	1579	3055	2400	1344	3668	1331	825	1289	1894	1734	1062	2065
2022	610	1574	3053	2400	1343	3663	1331	823	1287	1893	1734	1057	2064
2022	610	1571	3051	2400	1343	3663	1328	823	1284	1891	1734	1057	2063
2020	607	1567	3048	2400	1342	3662	1328	822	1280	1889	1734	1056	2063
2019	607	1564	3043	2393	1342	3662	1327	817	1278	1879	1734	1056	2063
2019	607	1560	3042	2393	1340	3654	1327	817	1276	1879	1734	1054	2057
2017	607	1557	3042	2393	1340	3651	1326	817	1274	1879	1717	1054	2057
2016	603	1557	3040	2393	1335	3651	1326	810	1261	1877	1717	1053	2057
2015	603	1555	3032	2393	1335	3650	1323	810	1258	1876	1717	1053	2055
2014	601	1555	3032	2391	1332	3650	1323	808	1257	1869	1717	1046	2054
2013	600	1554	3028	2391	1332	3642	1323	808	1256	1868	1717	1046	2053
2009	598	1551	3018	2391	1332	3642	1322	808	1256	1868	1717	1045	2052
2008	595	1547	3011	2391	1332	3636	1321	807	1250	1866	1717	1045	2051
2008	595	1542	3011	2382	1331	3636	1320	805	1249	1866	1717	1043	2047
2007	595	1542	3004	2382	1331	3634	1320	801	1247	1864	1715	1043	2045
2007	594	1536	3004	2382	1330	3634	1319	798	1243	1854	1715	1043	2043
2005	594	1534	2990	2382	1330	3634	1319	795	1243	1853	1715	1043	2043
2002	588	1530	2974	2382	1329	3623	1318	793	1239	1852	1715	1039	2043
2001	588	1529	2974	2381	1329	3623	1317	792	1237	1852	1715	1039	2043
2001	586	1528	2972	2381	1326	3619	1317	792	1237	1850	1715	1038	2042
1998	586	1528	2962	2381	1326	3619	1316	792	1237	1846	1715	1038	2040
1994	583	1524	2959	2381	1325	3617	1316	790	1235	1843	1715	1038	2037
1993	583	1523	2945	2380	1325	3617	1315	787	1228	1842	1714	1038	2037
1990	583	1521	2941	2380	1325	3608	1315	787	1225	1841	1714	1037	2037
1989	583	1518	2938	2380	1325	3608	1313	787	1224	1841	1714	1037	2037
1989	583	1518	2933	2380	1325	3604	1312	781	1223	1838	1714	1036	2036
1989	582	1515	2932	2380	1325	3603	1311	781	1222	1837	1714	1036	2033
1986	579	1514	2930	2377	1318	3603	1310	780	1219	1834	1714	1036	2033
1984	579	1512	2928	2377	1318	3599	1309	777	1219	1834	1714	1036	2033
1983	579	1509	2903	2377	1318	3599	1309	775	1218	1834	1699	1035	2033
1982	576	1501	2903	2377	1318	3598	1309	774	1217	1831	1699	1035	2032
1981	576	1496	2902	2377	1317	3598	1306	774	1216	1830	1699	1035	2032
1980	574	1495	2901	2366	1317	3597	1306	774	1216	1829	1699	1035	2032
1979	574	1494	2898	2366	1316	3597	1304	771	1216	1829	1699	1033	2032
1977	574	1492	2883	2366	1316	3593	1301	771	1215	1821	1699	1033	2031
1977	573	1492	2882	2366	1315	3593	1301	771	1215	1818	1699	1032	2030
1977	571	1491	2882	2366	1315	3581	1300	769	1214	1816	1699	1032	2029
1976	571	1490	2880	2363	1315	3581	1298	768	1211	1812	1699	1031	2028
1976	571	1485	2871	2363	1314	3576	1297	766	1211	1807	1699	1031	2028
1976	568	1485	2867	2363	1314	3576	1297	765	1210	1804	1699	1030	2028
1976	567	1477	2866	2363	1313	3574	1297	762	1201	1803	1699	1030	2027
1975	567	1476	2859	2363	1312	3574	1297	760	1196	1800	1699	1029	2026
1975	564	1476	2859	2361	1312	3571	1293	760	1194	1797	1699	1029	2025
1973	564	1476	2854	2361	1312	3571	1293	757	1193	1797	1699	1029	2025
1972	564	1466	2848	2361	1312	3571	1292	757	1191	1796	1699	1029	2024
1971	562	1465	2841	2361	1310	3571	1291	754	1191	1794	1698	1024	2022
1971	559	1465	2839	2361	1310	3563	1291	754	1190	1789	1698	1024	2021
1970	559	1464	2838	2360	1300	3561	1290	754	1185	1789	1698	1024	2021
1968	559	1464	2823	2360	1300	3559	1289	754	1182	1789	1698	1024	2020
1967	559	1455	2821	2360	1298	3559	1288	754	1176	1789	1698	1023	2018
1962	558	1454	2820	2360	1298	3555	1287	753	1175	1783	1698	1023	2018
1962	558	1454	2820	2360	1296	3555	1287	748	1174	1782	1698	1023	2017
1962	558	1452	2819	2348	1296	3548	1286	747	1174	1782	1689	1023	2017
1961	558	1450	2815	2348	1295	3548	1286	747	1173	1779	1689	1022	2017
1958	558	1449	2814	2348	1295	3542	1285	745	1172	1778	1689	1022	2017
1958	556	1447	2814	2348	1294	3539	1285	741	1165	1773	1689	1022	2017
1957	556	1446	2813	2332	1294	3539	1284	739	1165	1769	1689	1022	2015
1950	555	1446	2810	2332	1291	3537	1280	736	1165	1768	1689	1021	2015
1949	553	1445	2806	2332	1289	3537	1279	735	1164	1767	1689	1021	2014
1949	553	1425	2806	2332	1289	3534	1278	735	1163	1764	1688	1021	2014
1948	553	1417	2806	2332	1288	3532	1278	735	1160	1764	1688	1021	2013
1943	550	1417	2806	2324	1288	3527	1278	735	1160	1763	1688	1020	2013
1943	550	1409	2804	2324	1285	3526	1277	735	1159	1759	1688	1020	2012
1942	549	1406	2797	2324	1285	3526	1276	733	1151	1757	1688	1019	2012
1942	549	1401	2794	2324	1284	3518	1275	729	1148	1754	1688	1019	2010
1941	549	1398	2794	2324	1283	3518	1275	724	1145	1754	1688	1019	2010
1940	544	1397	2787	2323	1283	3518	1274	723	1143	1753	1688	1019	2008
1940	543	1396	2780	2323	1283	3516	1274	721	1142	1752	1684	1018	2008
1940	543	1390	2768	2323	1283	3507	1274	720	1133	1750	1684	1018	2008
1940	543	1388	2759	2323	1281	3505	1273	718	1133	1747	1684	1016	2007
1938	543	1386	2756	2323	1281	3505	1273	718	1131	1747	1684	1016	2005
1936	543	1384	2744	2323	1280	3499	1272	717	1125	1746	1684	1016	2005
1936	543	1382	2739	2323	1279	3499	1272	715	1122	1746	1684	1016	2005
1935	541	1379	2734	2323	1279	3492	1270	714	1119	1741	1684	1015	2005
1933	541	1377	2728	2323	1276	3492	1270	711	1117	1738	1684	1015	2005
1932	541	1374	2728	2321	1274	3490	1268	709	1114	1738	1676	1015	2005
1932	541	1369	2728	2321	1274	3490	1267	709	1113	1735	1676	1015	2003
1932	541	1366	2728	2321	1273	3490	1267	708	1112	1734	1676	1011	2003
1932	535	1366	2723	2321	1273	3485	1264	706	1112	1729	1676	1011	2002
1927	534	1363	2723	2313	1273	3485	1263	706	1111	1728	1676	1008	2002
1926	532	1363	2721	2313	1273	3484	1262	703	1100	1728	1676	1008	2002
1925	532	1361	2721	2313	1273	3481	1262	700	1097	1727	1676	1007	2001
1924	531	1359	2717	2313	1271	3481	1262	700	1096	1722	1676	1007	2001
1924	529	1359	2715	2313	1267	3481	1261	697	1094	1720	1668	1006	2000
1922	529	1358	2713	2305	1267	3480	1259	691	1093	1717	1668	1006	1998
1922	526	1356	2713	2305	1266	3480	1258	691	1089	1715	1668	1005	1998
1921	526	1355	2712	2305	1266	3477	1256	691	1086	1713	1668	1005	1998
1920	526	1352	2701	2305	1265	3477	1254	688	1080	1712	1668	1004	1995
1917	526	1348	2700	2305	1265	3476	1254	688	1071	1709	1668	1004	1993
1917	526	1346	2682	2277	1265	3476	1253	688	1070	1709	1668	1003	1991
1916	526	1346	2671	2277	1264	3471	1252	688	1069	1707	1668	1003	1991
1915	526	1344	2671	2277	1263	3469	1252	688	1068	1706	1667	1002	1991
1913	517	1342	2670	2277	1263	3469	1250	687	1067	1706	1667	1002	1990
1911	517	1342	2655	2277	1262	3464	1249	684	1065	1702	1667	999	1990
1911	517	1339	2655	2275	1260	3464	1249	684	1058	1700	1667	999	1988
1910	517	1339	2653	2275	1260	3449	1249	684	1058	1699	1667	997	1988
1909	517	1339	2641	2275	1260	3449	1245	682	1054	1696	1667	997	1983
1909	517	1337	2638	2275	1260	3438	1244	682	1052	1695	1667	994	1983
1908	516	1337	2631	2275	1259	3438	1243	681	1052	1693	1641	994	1982
1907	516	1336	2603	2265	1259	3438	1243	679	1049	1691	1641	993	1982
1906	516	1333	2593	2265	1259	3438	1242	673	1046	1683	1641	993	1982
1906	516	1328	2593	2265	1259	3432	1242	673	1040	1678	1641	993	1981
1905	511	1327	2592	2265	1259	3432	1239	667	1039	1677	1641	993	1981
1904	508	1323	2591	2265	1258	3428	1239	666	1039	1675	1641	992	1979
1903	507	1317	2591	2253	1256	3421	1239	666	1037	1674	1641	992	1979
1902	507	1314	2590	2253	1256	3421	1237	666	1034	1671	1635	991	1979
1902	507	1313	2590	2253	1255	3421	1237	664	1033	1671	1635	991	1978
1902	507	1307	2583	2253	1255	3421	1234	661	1029	1668	1635	991	1977
1900	505	1296	2569	2253	1247	3420	1233	661	1027	1668	1635	991	1976
1899	505	1296	2565	2234	1247	3397	1231	660	1025	1667	1635	990	1976
1899	504	1294	2564	2234	1247	3389	1231	660	1024	1658	1635	990	1976
1897	504	1294	2563	2234	1246	3389	1230	660	1023	1658	1635	990	1971
1892	504	1291	2559	2234	1246	3375	1230	660	1021	1656	1631	990	1971
1890	504	1290	2558	2234	1245	3375	1230	658	1019	1655	1631	987	1971
1889	504	1289	2556	2225	1245	3352	1230	657	1017	1648	1631	987	1971
1887	502	1288	2549	2225	1245	3351	1229	651	1014	1643	1631	987	1971
1887	502	1288	2548	2225	1244	3351	1229	646	1008	1643	1631	987	1970
1886	502	1288	2548	2225	1241	3349	1227	646	1005	1642	1631	987	1969
1883	502	1286	2544	2225	1239	3349	1225	646	1004	1641	1631	987	1964
1881	501	1283	2543	2224	1238	3337	1225	643	1001	1641	1618	984	1963
1881	498	1278	2539	2224	1238	3337	1225	643	1001	1634	1618	984	1963
1880	498	1276	2539	2224	1235	3334	1221	643	998	1634	1618	983	1963
1880	498	1275	2535	2224	1233	3334	1221	643	998	1629	1618	983	1962
1877	498	1275	2534	2224	1230	3333	1220	639	997	1623	1618	976	1961
1874	495	1273	2530	2220	1229	3333	1216	639	992	1621	1618	976	1961
1873	495	1273	2523	2220	1229	3333	1214	639	990	1620	1618	974	1960
1871	495	1271	2521	2220	1227	3333	1213	633	988	1620	1614	974	1960
1870	492	1268	2515	2220	1226	3322	1212	633	984	1618	1614	974	1960
1870	492	1267	2513	2216	1219	3321	1212	631	983	1617	1614	974	1958
1869	492	1261	2508	2216	1219	3321	1211	630	983	1616	1614	973	1958
1868	489	1242	2505	2216	1218	3306	1210	630	977	1614	1614	973	1956
1867	489	1236	2503	2216	1218	3306	1209	627	975	1611	1614	972	1956
1865	486	1235	2502	2216	1217	3303	1209	625	974	1611	1614	972	1954
1864	486	1234	2499	2205	1217	3303	1209	625	974	1607	1602	972	1953
1863	484	1230	2489	2205	1211	3291	1208	625	973	1605	1602	972	1952
1863	484	1228	2484	2205	1210	3291	1208	625	967	1605	1602	971	1952
1863	484	1225	2484	2205	1210	3283	1206	624	957	1602	1602	971	1951
1861	484	1223	2481	2205	1209	3283	1205	622	957	1601	1602	966	1949
1861	483	1221	2475	2203	1208	3271	1204	622	957	1596	1602	966	1948
1860	483	1214	2474	2203	1208	3271	1204	622	956	1586	1602	965	1945
1860	483	1213	2473	2203	1198	3267	1203	622	956	1585	1602	965	1945
1859	483	1210	2473	2203	1198	3267	1202	621	954	1581	1602	961	1945
1859	483	1210	2459	2203	1195	3267	1202	621	953	1574	1602	961	1943
1858	483	1204	2452	2198	1193	3251	1201	619	946	1562	1602	960	1941
1858	483	1201	2451	2198	1193	3251	1200	618	945	1562	1602	960	1941
1857	481	1193	2450	2198	1192	3249	1198	618	943	1561	1602	960	1939
1855	481	1192	2447	2198	1190	3249	1197	615	942	1560	1602	960	1937
1853	478	1192	2446	2198	1190	3245	1197	612	941	1560	1602	957	1936
1853	478	1191	2443	2190	1187	3245	1196	612	939	1558	1602	957	1931
1851	477	1189	2443	2190	1187	3244	1196	610	938	1558	1589	956	1931
1850	477	1186	2432	2190	1187	3244	1196	609	938	1548	1589	956	1931
1850	477	1185	2432	2190	1186	3231	1195	609	936	1546	1589	953	1931
1848	475	1179	2410	2189	1186	3231	1195	609	936	1542	1589	953	1930
1848	471	1179	2407	2189	1186	3221	1194	607	934	1539	1589	953	1930
1846	471	1176	2407	2189	1185	3221	1194	607	929	1539	1589	953	1930
1844	471	1173	2406	2189	1183	3216	1194	604	922	1538	1589	948	1929
1844	471	1170	2406	2189	1182	3216	1194	603	915	1537	1589	948	1929
1844	471	1169	2400	2171	1182	3194	1191	600	915	1535	1586	946	1929
1843	469	1165	2391	2171	1182	3183	1190	600	910	1535	1586	946	1929
1843	469	1165	2386	2171	1182	3183	1188	598	905	1528	1586	941	1929
1842	469	1164	2379	2171	1177	3178	1187	598	903	1521	1586	941	1928
1842	469	1161	2378	2171	1174	3178	1186	598	903	1520	1586	941	1928
1841	468	1160	2378	2168	1173	3177	1186	597	903	1515	1586	941	1926
1841	468	1159	2377	2168	1173	3177	1185	595	901	1514	1586	938	1926
1840	466	1156	2377	2168	1172	3173	1185	594	898	1513	1586	938	1921
1840	466	1153	2374	2168	1172	3173	1183	589	897	1513	1581	934	1921
1839	465	1146	2369	2168	1171	3150	1183	588	897	1512	1581	934	1920
1839	457	1144	2344	2155	1171	3142	1181	586	896	1512	1581	933	1919
1837	456	1143	2341	2155	1169	3142	1180	585	893	1510	1581	933	1919
1837	454	1140	2341	2155	1169	3137	1180	585	891	1506	1581	931	1918
1835	454	1138	2337	2155	1169	3137	1179	585	890	1504	1581	931	1918
1834	453	1138	2337	2155	1169	3132	1177	585	888	1503	1581	930	1917
1831	453	1136	2327	2145	1168	3122	1175	583	888	1496	1581	930	1915
1829	451	1134	2325	2145	1168	3102	1175	583	886	1493	1578	930	1914
1829	451	1133	2325	2145	1167	3099	1174	583	881	1493	1578	930	1912
1828	451	1131	2324	2145	1165	3099	1174	582	880	1490	1578	929	1911
1825	450	1131	2316	2145	1162	3095	1172	580	880	1487	1578	929	1910
1821	450	1130	2316	2134	1162	3073	1171	579	879	1487	1578	926	1908
1819	448	1129	2305	2134	1161	3073	1171	577	877	1486	1578	926	1908
1819	448	1123	2300	2134	1160	3053	1170	576	876	1485	1578	926	1907
1818	447	1121	2295	2134	1160	3052	1168	576	874	1484	1575	926	1907
1817	447	1119	2293	2134	1160	3052	1167	574	873	1480	1575	925	1905
1817	447	1116	2293	2132	1159	3047	1167	570	870	1479	1575	925	1905
1817	447	1116	2292	2132	1157	3047	1164	568	869	1473	1575	923	1905
1816	447	1115	2290	2132	1156	3026	1163	567	865	1473	1575	923	1903
1813	447	1103	2285	2132	1156	3026	1162	567	864	1466	1575	920	1903
1813	445	1102	2285	2112	1156	3006	1162	565	864	1463	1575	920	1903
1813	441	1102	2275	2112	1154	3006	1161	565	864	1463	1575	919	1900
1812	441	1101	2274	2112	1153	2972	1161	559	860	1463	1575	919	1900
1811	439	1096	2274	2112	1150	2972	1160	556	860	1463	1575	917	1898
1810	436	1095	2267	2104	1147	2964	1159	556	859	1463	1575	917	1897
1809	436	1093	2264	2104	1145	2964	1158	556	858	1459	1575	916	1897
1809	435	1089	2252	2104	1144	2947	1158	555	858	1459	1575	916	1896
1808	435	1084	2248	2104	1141	2947	1157	555	856	1457	1575	911	1895
1808	435	1083	2248	2104	1140	2937	1156	553	856	1456	1575	911	1893
1807	433	1080	2239	2103	1139	2937	1156	547	856	1456	1563	907	1893
1804	432	1070	2228	2103	1139	2937	1156	547	855	1454	1563	907	1893
1804	432	1068	2228	2103	1138	2906	1154	546	848	1453	1563	905	1891
1803	432	1066	2216	2103	1137	2906	1154	544	840	1451	1563	905	1891
1803	432	1063	2204	2103	1136	2865	1153	543	836	1448	1563	902	1889
1799	430	1060	2204	2097	1133	2865	1153	543	833	1445	1563	902	1886
1798	430	1056	2204	2097	1133	2848	1152	543	830	1443	1563	901	1886
1797	430	1055	2198	2097	1133	2848	1148	541	823	1443	1563	901	1885
1797	430	1039	2192	2097	1129	2837	1147	541	822	1442	1541	900	1884
1796	429	1039	2187	2097	1129	2837	1146	537	818	1440	1541	900	1882
1796	429	1037	2183	2085	1126	2831	1146	535	817	1438	1541	897	1880
1795	427	1035	2176	2085	1124	2828	1145	535	814	1435	1541	897	1880
1793	427	1035	2174	2085	1123	2828	1144	535	814	1435	1541	897	1878
1792	426	1031	2172	2085	1118	2802	1144	534	813	1433	1541	897	1878
1792	426	1024	2172	2085	1117	2802	1144	531	812	1433	1541	895	1878
1791	426	1022	2161	2083	1116	2721	1142	529	808	1432	1541	895	1877
1790	426	1020	2159	2083	1114	2721	1142	529	807	1431	1526	895	1876
1790	421	1015	2147	2083	1113	2705	1141	526	807	1430	1526	895	1876
1788	420	1013	2147	2083	1113	2705	1141	526	805	1430	1526	894	1876
1784	420	999	2142	2083	1112	2691	1139	525	800	1430	1526	894	1875
1784	418	995	2140	2073	1110	2648	1137	525	800	1425	1526	890	1873
1784	418	989	2140	2073	1108	2648	1137	525	797	1424	1526	890	1873
1783	418	987	2140	2073	1108	2627	1136	525	796	1422	1526	890	1873
1781	417	987	2138	2073	1107	2595	1136	523	794	1420	1526	890	1868
1780	417	987	2136	2073	1103	2595	1134	523	792	1419	1506	888	1868
1780	417	985	2133	2072	1103	2575	1133	523	792	1416	1506	888	1868
1780	417	983	2126	2072	1101	2543	1133	522	792	1413	1506	886	1868
1780	417	981	2117	2072	1098	2543	1132	522	791	1412	1506	886	1868
1779	415	973	2112	2072	1093	2492	1131	519	789	1408	1506	886	1867
1778	415	969	2112	2072	1091	2492	1130	519	788	1406	1506	886	1866
1777	412	969	2112	2070	1089	2468	1130	519	786	1401	1506	883	1865
1777	412	967	2104	2070	1088	2459	1129	519	786	1398	1506	883	1863
1777	409	966	2104	2070	1085	2459	1129	517	784	1398	1502	883	1861
1775	408	964	2101	2070	1084	2443	1127	517	781	1394	1502	883	1855
1775	408	963	2098	2070	1084	2433	1126	517	777	1394	1502	883	1853
1775	408	961	2094	2049	1083	2433	1125	517	777	1392	1502	883	1853
1774	408	961	2091	2049	1082	2414	1125	516	775	1373	1502	880	1849
1773	408	961	2085	2049	1082	2329	1125	514	775	1373	1502	880	1845
1773	408	959	2066	2049	1081	2303	1125	510	774	1373	1502	877	1843
1771	408	959	2057	2049	1079	2159	1124	508	774	1372	1502	877	1842
1770	406	955	2054	2027	1076	2159	1123	508	773	1368	1487	875	1842
1767	406	954	2054	2027	1074	2005	1120	505	771	1362	1487	875	1840
1767	406	954	2049	2027	1072	1998	1120	504	771	1359	1487	874	1840
1766	405	950	2038	2027	1070	1994	1120	504	770	1355	1487	874	1840
1765	405	949	2038	2027	1066	1994	1120	502	768	1349	1487	873	1840
1764	405	948	2038	2022	1064	1967	1119	499	766	1345	1487	873	1840
1764	405	945	2038	2022	1056	1967	1119	499	758	1340	1487	870	1838
1763	403	945	2031	2022	1055	1967	1118	498	755	1336	1487	870	1838
1763	402	943	2028	2022	1055	1947	1115	496	754	1333	1464	868	1835
1761	400	943	2028	2022	1054	1946	1114	495	750	1331	1464	868	1834
1760	399	940	2028	2020	1053	1946	1114	495	749	1329	1464	868	1834
1759	399	937	2022	2020	1053	1940	1114	495	746	1329	1464	868	1832
1759	399	934	2017	2020	1053	1940	1114	495	743	1327	1464	867	1832
1756	399	934	2017	2020	1051	1940	1113	492	739	1322	1464	867	1831
1756	397	932	2016	2020	1051	1915	1112	490	738	1322	1464	866	1828
1756	394	929	2012	1999	1048	1915	1110	490	734	1320	1464	866	1827
1756	394	926	2005	1999	1048	1887	1109	489	733	1320	1461	865	1827
1754	393	922	2003	1999	1048	1887	1104	489	730	1318	1461	865	1825
1754	393	919	2001	1999	1046	1803	1103	487	729	1313	1461	858	1825
1751	391	918	1996	1999	1043	1803	1103	487	729	1310	1461	858	1824
1751	391	916	1993	1997	1042	1725	1103	486	728	1308	1461	857	1823
1751	391	908	1982	1997	1041	1725	1102	484	728	1308	1461	857	1822
1751	388	906	1981	1997	1041	1683	1101	484	728	1304	1461	853	1817
1751	388	905	1977	1997	1039	1680	1101	483	722	1298	1428	853	1815
1750	387	905	1960	1997	1035	1680	1101	483	720	1297	1428	852	1813
1749	387	901	1938	1972	1034	1670	1100	481	717	1295	1428	852	1813
1749	385	900	1938	1972	1029	1670	1099	480	715	1286	1428	852	1809
1748	384	891	1930	1972	1028	1643	1097	480	715	1284	1428	852	1805
1748	384	882	1930	1972	1028	1643	1096	477	714	1277	1428	851	1803
1748	384	882	1929	1972	1027	1614	1096	477	712	1274	1428	851	1803
1747	382	881	1929	1961	1024	1614	1096	477	710	1273	1428	841	1802
1745	382	879	1921	1961	1021	1586	1095	474	709	1270	1416	841	1793
1745	378	878	1907	1961	1021	1586	1094	474	699	1267	1416	837	1792
1743	378	876	1905	1961	1015	1583	1093	472	699	1265	1416	837	1791
1743	376	874	1904	1961	1015	1537	1093	472	698	1262	1416	832	1791
1742	376	868	1898	1960	1012	1537	1092	471	697	1260	1416	832	1789
1741	375	868	1898	1960	1010	1533	1092	469	697	1259	1416	831	1788
1741	369	862	1897	1960	1006	1498	1089	466	692	1259	1416	831	1786
1741	369	860	1892	1960	1005	1473	1089	465	691	1255	1416	831	1786
1740	369	858	1891	1954	1005	1473	1088	463	689	1252	1394	831	1784
1739	369	855	1889	1954	1003	1471	1088	460	686	1250	1394	831	1782
1739	367	855	1889	1954	999	1471	1088	457	685	1249	1394	831	1780
1738	367	846	1889	1954	999	1432	1087	456	685	1248	1394	828	1780
1737	366	843	1873	1954	994	1422	1087	454	683	1248	1394	828	1778
1737	363	842	1870	1947	992	1422	1084	454	683	1248	1394	827	1778
1736	358	832	1870	1947	990	1421	1084	448	683	1246	1394	827	1778
1736	357	830	1865	1947	989	1412	1083	448	679	1246	1394	826	1777
1736	357	829	1865	1947	989	1412	1082	445	673	1244	1312	826	1774
1735	357	828	1863	1947	988	1410	1081	444	673	1242	1312	826	1774
1735	357	823	1860	1941	988	1371	1080	442	671	1242	1312	826	1773
1734	355	819	1858	1941	986	1358	1079	439	668	1241	1312	822	1767
1733	351	818	1855	1941	985	1344	1078	439	667	1236	1312	822	1767
1731	351	818	1855	1941	985	1344	1077	433	665	1236	1312	819	1766
1731	349	813	1849	1941	984	1333	1077	432	663	1232	1312	819	1765
1731	348	805	1845	1941	982	1333	1077	432	661	1232	1312	819	1764
1730	348	805	1845	1941	982	1308	1076	432	659	1228	1295	819	1764
1729	345	804	1838	1941	982	1294	1076	426	658	1225	1295	812	1763
1728	345	804	1836	1941	980	1261	1075	424	656	1218	1295	812	1761
1728	345	796	1833	1935	978	1261	1075	424	656	1215	1295	811	1756
1728	343	789	1830	1935	976	1246	1074	423	655	1215	1295	811	1755
1727	343	789	1823	1935	975	1222	1074	421	655	1215	1295	807	1755
1726	339	787	1813	1935	973	1222	1074	421	653	1214	1295	807	1755
1726	339	785	1812	1935	972	1214	1074	421	653	1214	1295	803	1753
1726	339	784	1812	1927	971	1214	1074	418	652	1214	1270	803	1753
1725	337	782	1811	1927	971	1212	1073	418	649	1214	1270	802	1750
1725	337	779	1811	1927	971	1212	1070	415	649	1213	1270	802	1750
1724	331	777	1809	1927	969	1203	1070	415	646	1213	1270	796	1748
1724	330	775	1807	1927	969	1203	1069	411	643	1211	1270	796	1745
1724	330	771	1807	1921	968	1188	1069	411	642	1197	1270	796	1740
1723	322	768	1805	1921	967	1184	1068	411	641	1197	1270	796	1739
1722	321	767	1805	1921	965	1162	1068	411	637	1194	1261	794	1739
1722	321	766	1792	1921	965	1162	1066	411	637	1185	1261	794	1738
1722	319	762	1792	1921	963	1147	1065	409	635	1183	1261	793	1736
1720	316	760	1782	1903	962	1147	1065	409	635	1179	1261	793	1735
1719	312	754	1782	1903	962	1142	1063	408	630	1179	1261	791	1733
1719	312	750	1774	1903	961	1142	1062	408	627	1178	1261	791	1733
1718	312	744	1774	1903	960	1131	1062	406	627	1178	1261	786	1727
1718	309	744	1769	1903	956	1131	1062	400	627	1178	1261	786	1727
1717	309	741	1769	1900	953	1128	1061	399	624	1174	1253	783	1727
1717	307	739	1768	1900	951	1128	1061	396	624	1174	1253	783	1727
1716	307	739	1766	1900	951	1119	1059	393	621	1171	1253	782	1726
1716	306	739	1764	1900	947	1119	1059	391	617	1170	1253	782	1726
1716	306	733	1764	1900	944	1088	1057	391	617	1169	1253	781	1725
1715	306	732	1744	1900	943	1088	1057	388	616	1167	1253	781	1719
1715	306	731	1744	1900	942	1068	1055	387	615	1165	1253	780	1717
1714	303	731	1742	1900	939	1063	1055	385	615	1162	1253	780	1717
1714	301	727	1737	1900	939	1063	1055	385	612	1160	1249	779	1716
1714	300	726	1736	1900	935	1038	1054	379	611	1158	1249	779	1716
1713	298	722	1727	1897	930	1038	1052	378	608	1153	1249	778	1716
1712	295	722	1721	1897	930	1034	1051	378	608	1148	1249	778	1716
1712	295	721	1718	1897	926	1031	1049	376	607	1141	1249	776	1712
1711	295	719	1711	1897	921	1031	1049	372	605	1141	1249	776	1711
1711	295	718	1711	1897	920	1001	1047	369	602	1140	1249	775	1706
1711	294	715	1706	1893	920	997	1046	367	599	1140	1249	775	1706
1710	292	715	1706	1893	915	988	1046	367	599	1124	1228	772	1701
1710	292	714	1706	1893	914	988	1044	364	597	1116	1228	772	1698
1710	288	714	1704	1893	912	985	1044	360	596	1115	1228	771	1690
1710	288	714	1703	1893	908	985	1044	355	593	1115	1228	771	1690
1710	283	713	1685	1887	906	983	1042	355	593	1113	1228	770	1684
1709	280	713	1683	1887	904	971	1041	354	587	1104	1228	770	1681
1709	280	710	1683	1887	902	953	1041	354	584	1091	1228	767	1677
1709	280	699	1681	1887	900	953	1040	351	575	1084	1214	767	1676
1707	277	698	1676	1887	896	947	1040	351	573	1082	1214	760	1676
1702	277	695	1675	1868	895	947	1039	349	573	1082	1214	760	1673
1701	277	695	1668	1868	895	943	1039	348	573	1077	1214	759	1662
1700	277	693	1655	1868	891	943	1038	348	571	1075	1214	759	1660
1698	277	691	1654	1868	891	936	1037	346	570	1075	1214	751	1659
1698	277	689	1647	1868	886	909	1035	346	569	1075	1214	751	1654
1697	276	687	1641	1846	884	909	1034	345	566	1074	1178	748	1654
1696	273	683	1631	1846	884	909	1033	343	566	1072	1178	748	1647
1696	273	682	1608	1846	880	909	1031	340	565	1058	1178	744	1638
1696	271	682	1607	1846	875	904	1031	339	562	1056	1178	744	1637
1696	271	679	1593	1846	875	904	1031	339	557	1051	1178	741	1629
1695	271	676	1593	1810	870	885	1031	339	555	1048	1178	741	1628
1695	271	675	1593	1810	870	885	1029	337	554	1044	1178	735	1617
1694	270	675	1593	1810	869	881	1028	336	554	1041	1177	735	1612
1693	270	671	1573	1810	868	881	1027	328	554	1034	1177	730	1612
1693	265	666	1572	1810	866	880	1026	325	553	1029	1177	730	1594
1692	265	665	1570	1802	857	880	1025	324	553	1029	1177	729	1582
1692	265	662	1564	1802	856	865	1025	324	552	1024	1177	729	1580
1688	265	661	1551	1802	856	865	1024	324	551	1023	1177	729	1571
1688	265	661	1544	1802	856	846	1023	321	551	1023	1177	729	1562
1686	264	660	1525	1802	855	846	1022	319	549	1017	1169	728	1562
1684	261	651	1524	1758	855	810	1021	316	549	1016	1169	728	1560
1683	261	651	1519	1758	854	810	1019	313	546	1015	1169	726	1546
1681	255	642	1516	1758	850	808	1017	313	546	1015	1169	726	1545
1680	255	642	1514	1758	845	808	1016	310	544	1007	1169	721	1519
1679	253	638	1506	1758	845	789	1016	310	543	1000	1169	721	1509
1678	252	637	1493	1755	839	789	1016	309	541	996	1169	719	1473
1678	252	637	1482	1755	839	779	1016	303	541	989	1169	719	1464
1677	252	636	1471	1755	837	779	1014	297	540	989	1163	717	1448
1677	252	636	1434	1755	836	743	1014	295	540	980	1163	717	1428
1677	252	636	1433	1755	835	743	1014	295	538	964	1163	716	1420
1676	252	635	1420	1744	835	723	1013	291	538	964	1163	716	1420
1676	250	633	1420	1744	833	723	1013	291	536	960	1163	714	1403
1675	250	627	1420	1744	831	692	1013	289	534	960	1163	714	1394
1675	247	623	1410	1744	830	692	1012	286	534	958	1163	706	1378
1673	247	622	1407	1744	830	687	1012	285	533	956	1163	706	1328
1673	246	618	1398	1737	830	683	1012	282	532	950	1157	703	1285
1673	246	617	1395	1737	829	682	1011	280	530	950	1157	703	1254
1672	246	616	1393	1737	826	682	1011	276	529	946	1157	700	1242
1672	246	615	1391	1737	824	671	1011	274	522	936	1157	700	1205
1670	238	612	1391	1669	820	665	1010	274	519	932	1157	700	1128
1669	238	606	1386	1669	820	665	1009	274	518	928	1157	700	981
1669	238	599	1374	1669	817	662	1009	270	517	927	1157	694	960
1668	237	591	1374	1669	814	652	1009	268	510	926	1151	694	930
1666	237	585	1373	1669	811	652	1009	267	507	925	1151	691	930
1666	237	574	1371	1647	811	646	1009	262	507	925	1151	691	914
1666	237	571	1371	1647	809	639	1008	261	506	915	1151	690	914
1666	234	567	1359	1647	808	639	1008	258	505	911	1151	690	907
1665	234	566	1348	1647	807	634	1007	258	503	900	1151	688	907
1665	231	566	1343	1647	806	634	1007	258	501	899	1151	688	861
1664	231	559	1341	1593	805	623	1006	250	499	891	1119	686	832
1664	229	557	1312	1593	803	604	1006	250	494	887	1119	686	803
1664	229	552	1301	1593	802	590	1006	249	493	880	1119	684	803
1663	228	551	1297	1593	802	580	1005	249	491	868	1119	684	801
1663	228	551	1297	1593	801	580	1004	246	489	865	1119	684	760
1662	228	546	1280	1584	793	576	1003	244	487	852	1119	684	725
1662	226	545	1279	1584	792	576	1002	243	486	835	1119	681	725
1661	226	545	1252	1584	790	536	1001	241	483	833	1097	681	723
1660	226	542	1246	1584	788	536	1001	241	479	825	1097	679	703
1659	223	538	1231	1584	784	530	1001	241	477	824	1097	679	701
1659	223	538	1213	1554	779	530	999	241	476	823	1097	675	693
1658	216	538	1213	1554	779	511	999	241	475	820	1097	675	691
1657	213	538	1202	1554	777	499	998	238	473	818	1097	675	665
1657	208	536	1202	1554	775	471	998	238	472	815	1097	675	662
1657	208	534	1197	1554	771	471	997	235	471	804	953	674	654
1657	205	527	1197	1355	769	443	996	234	471	792	953	674	639
1657	196	526	1191	1355	769	443	995	232	465	778	953	670	632
1657	196	525	1191	1355	768	428	994	229	464	776	953	670	630
1657	195	524	1187	1355	766	428	993	228	461	771	953	668	624
1656	195	522	1177	1355	763	410	992	226	459	767	953	668	605
1656	193	515	1174	1351	762	402	991	225	456	766	953	663	596
1656	193	515	1173	1351	759	402	990	222	452	766	953	663	596
1656	184	508	1161	1351	758	368	990	220	451	766	929	656	587
1655	184	499	1142	1351	756	343	989	219	450	740	929	656	560
1655	180	498	1120	1351	750	343	989	219	447	721	929	652	560
1654	180	496	1010	1254	750	337	988	219	443	720	929	652	553
1653	178	495	985	1254	748	329	987	217	443	709	929	647	546
1653	178	494	984	1254	748	329	987	217	440	703	929	647	533
1653	177	490	977	1254	739	325	986	214	437	688	929	644	509
1652	177	490	956	1254	734	321	986	213	436	681	929	644	503
1651	175	489	945	1157	733	320	986	208	434	680	874	643	501
1649	175	487	924	1157	730	314	985	207	432	655	874	643	495
1649	175	486	924	1157	729	314	984	205	429	643	874	637	494
1648	175	485	913	1157	724	313	984	205	414	640	874	637	488
1648	174	484	903	1120	723	313	984	205	413	621	874	634	481
1648	165	483	903	1120	722	307	983	204	410	609	874	634	463
1646	165	483	830	1120	721	307	983	202	409	596	874	632	462
1644	154	480	800	1120	716	293	982	199	409	596	867	632	461
1644	151	473	796	1120	715	271	981	198	408	596	867	632	461
1644	132	468	791	1115	711	271	981	195	406	591	867	632	454
1644	132	466	781	1115	706	265	980	195	404	588	867	629	452
1643	126	464	758	1115	705	265	980	193	403	582	867	629	440
1642	126	463	738	1115	702	247	980	184	396	533	867	624	434
1642	115	456	727	1058	701	247	979	184	392	524	867	624	408
1642	115	454	694	1058	694	232	978	184	390	508	867	621	390
1642	114	450	684	1058	692	232	978	181	387	482	835	621	378
1641	111	448	652	1058	683	224	976	181	384	459	835	621	354
1639	108	448	652	1058	681	220	975	177	384	450	835	621	318
1638	106	445	626	1055	680	220	975	174	382	227	835	620	298
1638	106	443	536	1055	678	217	974	172	380	169	835	620	298
													276
													256
													243
													242
													239
													233
													211
													208
													187
													187
													179
													155
													154
													117
													69
													68
													68
													64
													53
													41
													31
													31
													28
													28
													28
													11
